# Supplementary material
Source: Elsevier journal article supplement (https://authors.library.caltech.edu/71144/2/mmc1.docx)
Supplement: mmc1 [file mmc1.docx]

Supporting Information for

**The 16 April 2016, *Mw* 7.8 (*MS* 7.5) Ecuador earthquake: a quasi-repeat of the 1942 *MS­* 7.5 earthquake and partial re-rupture of the 1906 *MS* 8.6 Colombia-Ecuador earthquake**

Lingling Yea,*, Hiroo Kanamoria, Jean-Philippe Avouaca, Linyan Lib, Kwok Fai Cheungb, Thorne Layc

aSeismological Laboratory, California Institute of Technology, Pasadena, CA 91125, USA

bDepartment of Ocean and Resources Engineering, University of Hawaii at Manoa, Honolulu, HI, 96822, USA

cDepartment of Earth and Planetary Sciences, University of California Santa Cruz, Santa Cruz, CA 95064, USA

*Corresponding author: Lingling Ye (lingling@gps.caltech.edu)

**Contents of this file**

Figures S1 to S9

Tables S1 to S3

Animations M1 to M4

**Introduction**

Supporting information includes 6 figures, 3 tables and 4 animations.

**
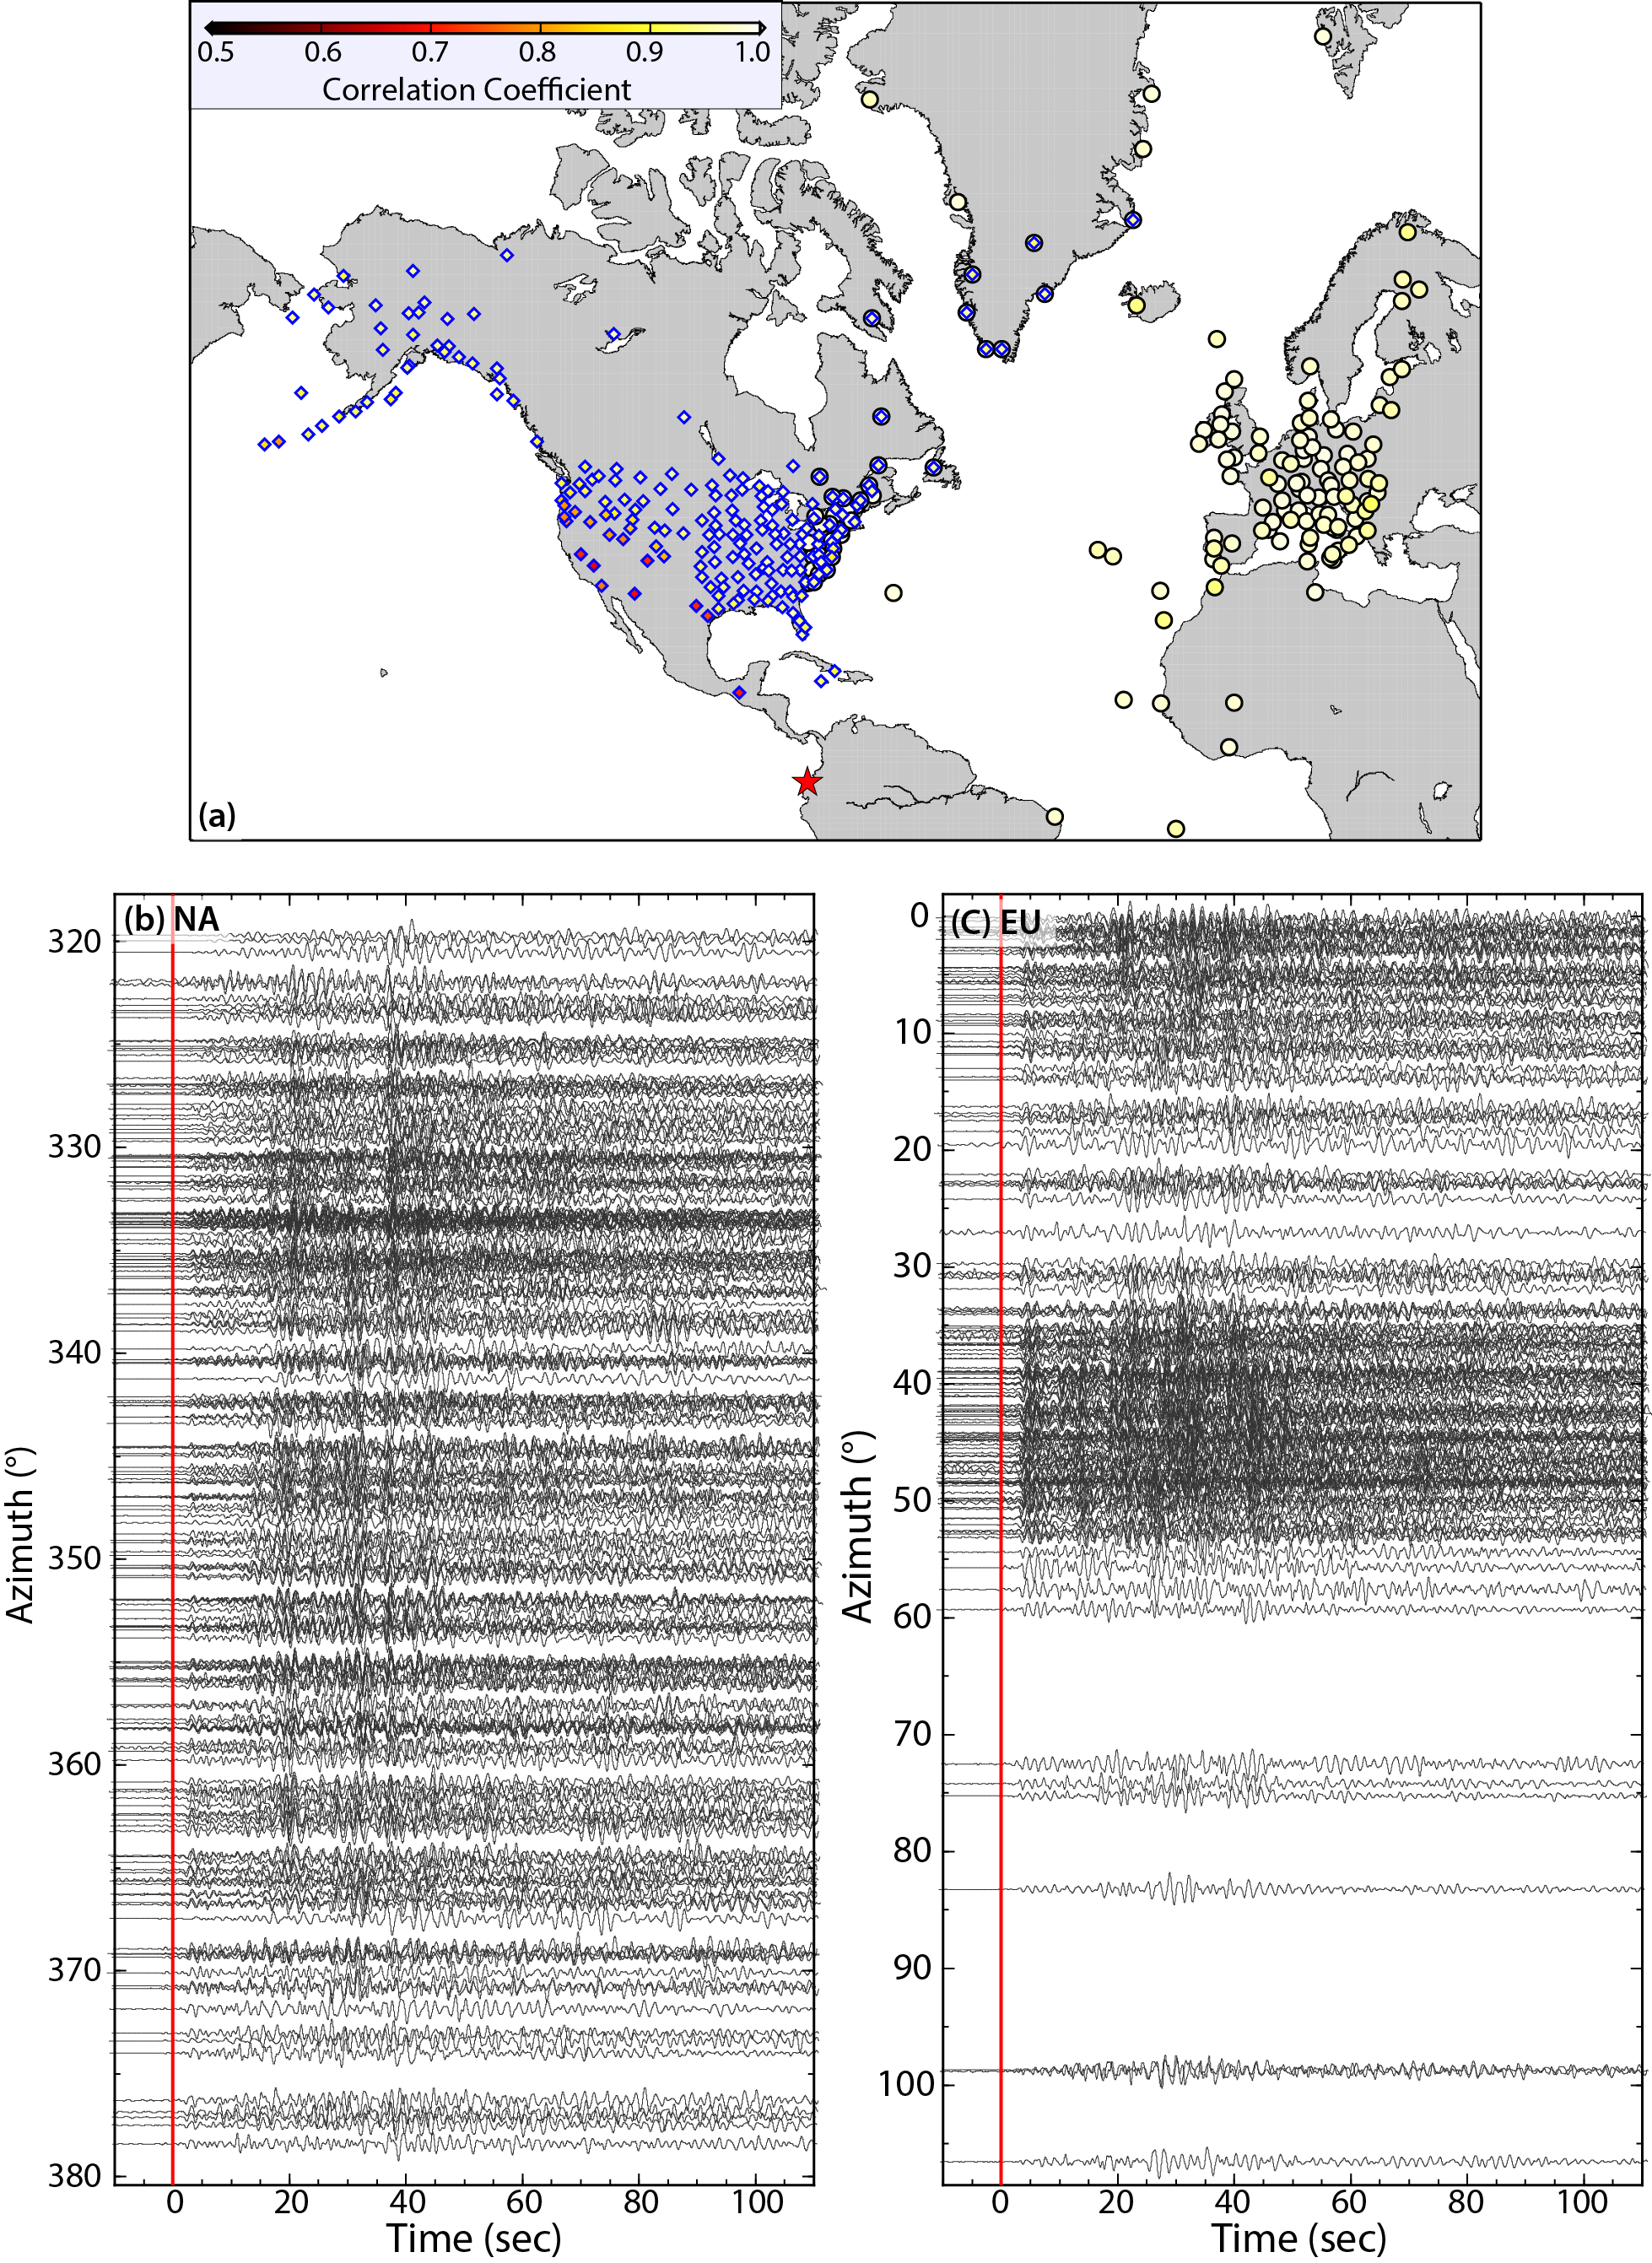
**

**Figure S1**. (a) Map of the broadband seismic station distributions in North America (NA, diamonds) and Europe (EU, circles) for which high frequency teleseismic P waves are back-projected to the source region, as shown in Figures 2 and 5a. The station symbols are color-coded with the correlation coefficients for the first ~ 10 s of the aligned broadband P traces within each network. The red star shows the 2016 mainshock epicenter. (b) and (c) are aligned teleseismic P waves in the frequency band of 0.5 – 2 Hz for NA and EU networks, respectively.


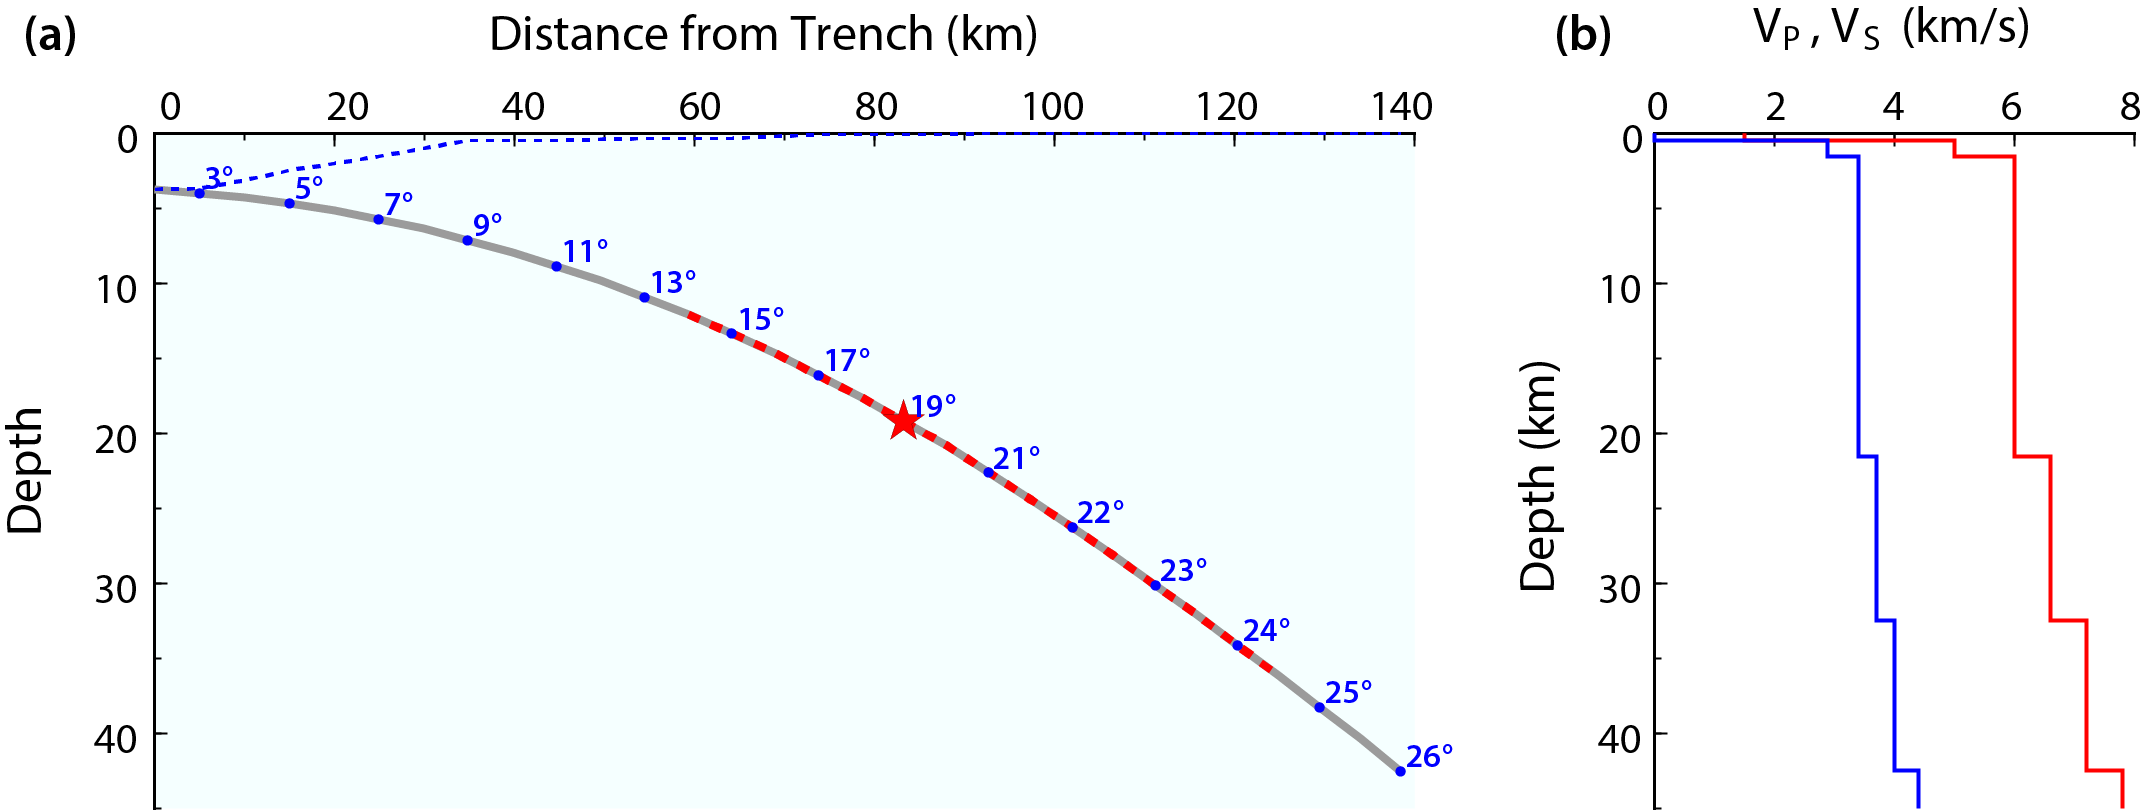


**Figure S2**. Megathrust geometry and source structure used in the finite-fault inversion for the 2016 Ecuador Earthquake. (a) Slab surface geometry approximated from slab 1.0 model [Hayes, 2012]. The red star shows the hypocenter of the 2016 event. (b) Source region velocity structure adapted from model Crust 2.0. Water depth varies with position for the offshore subfaults.


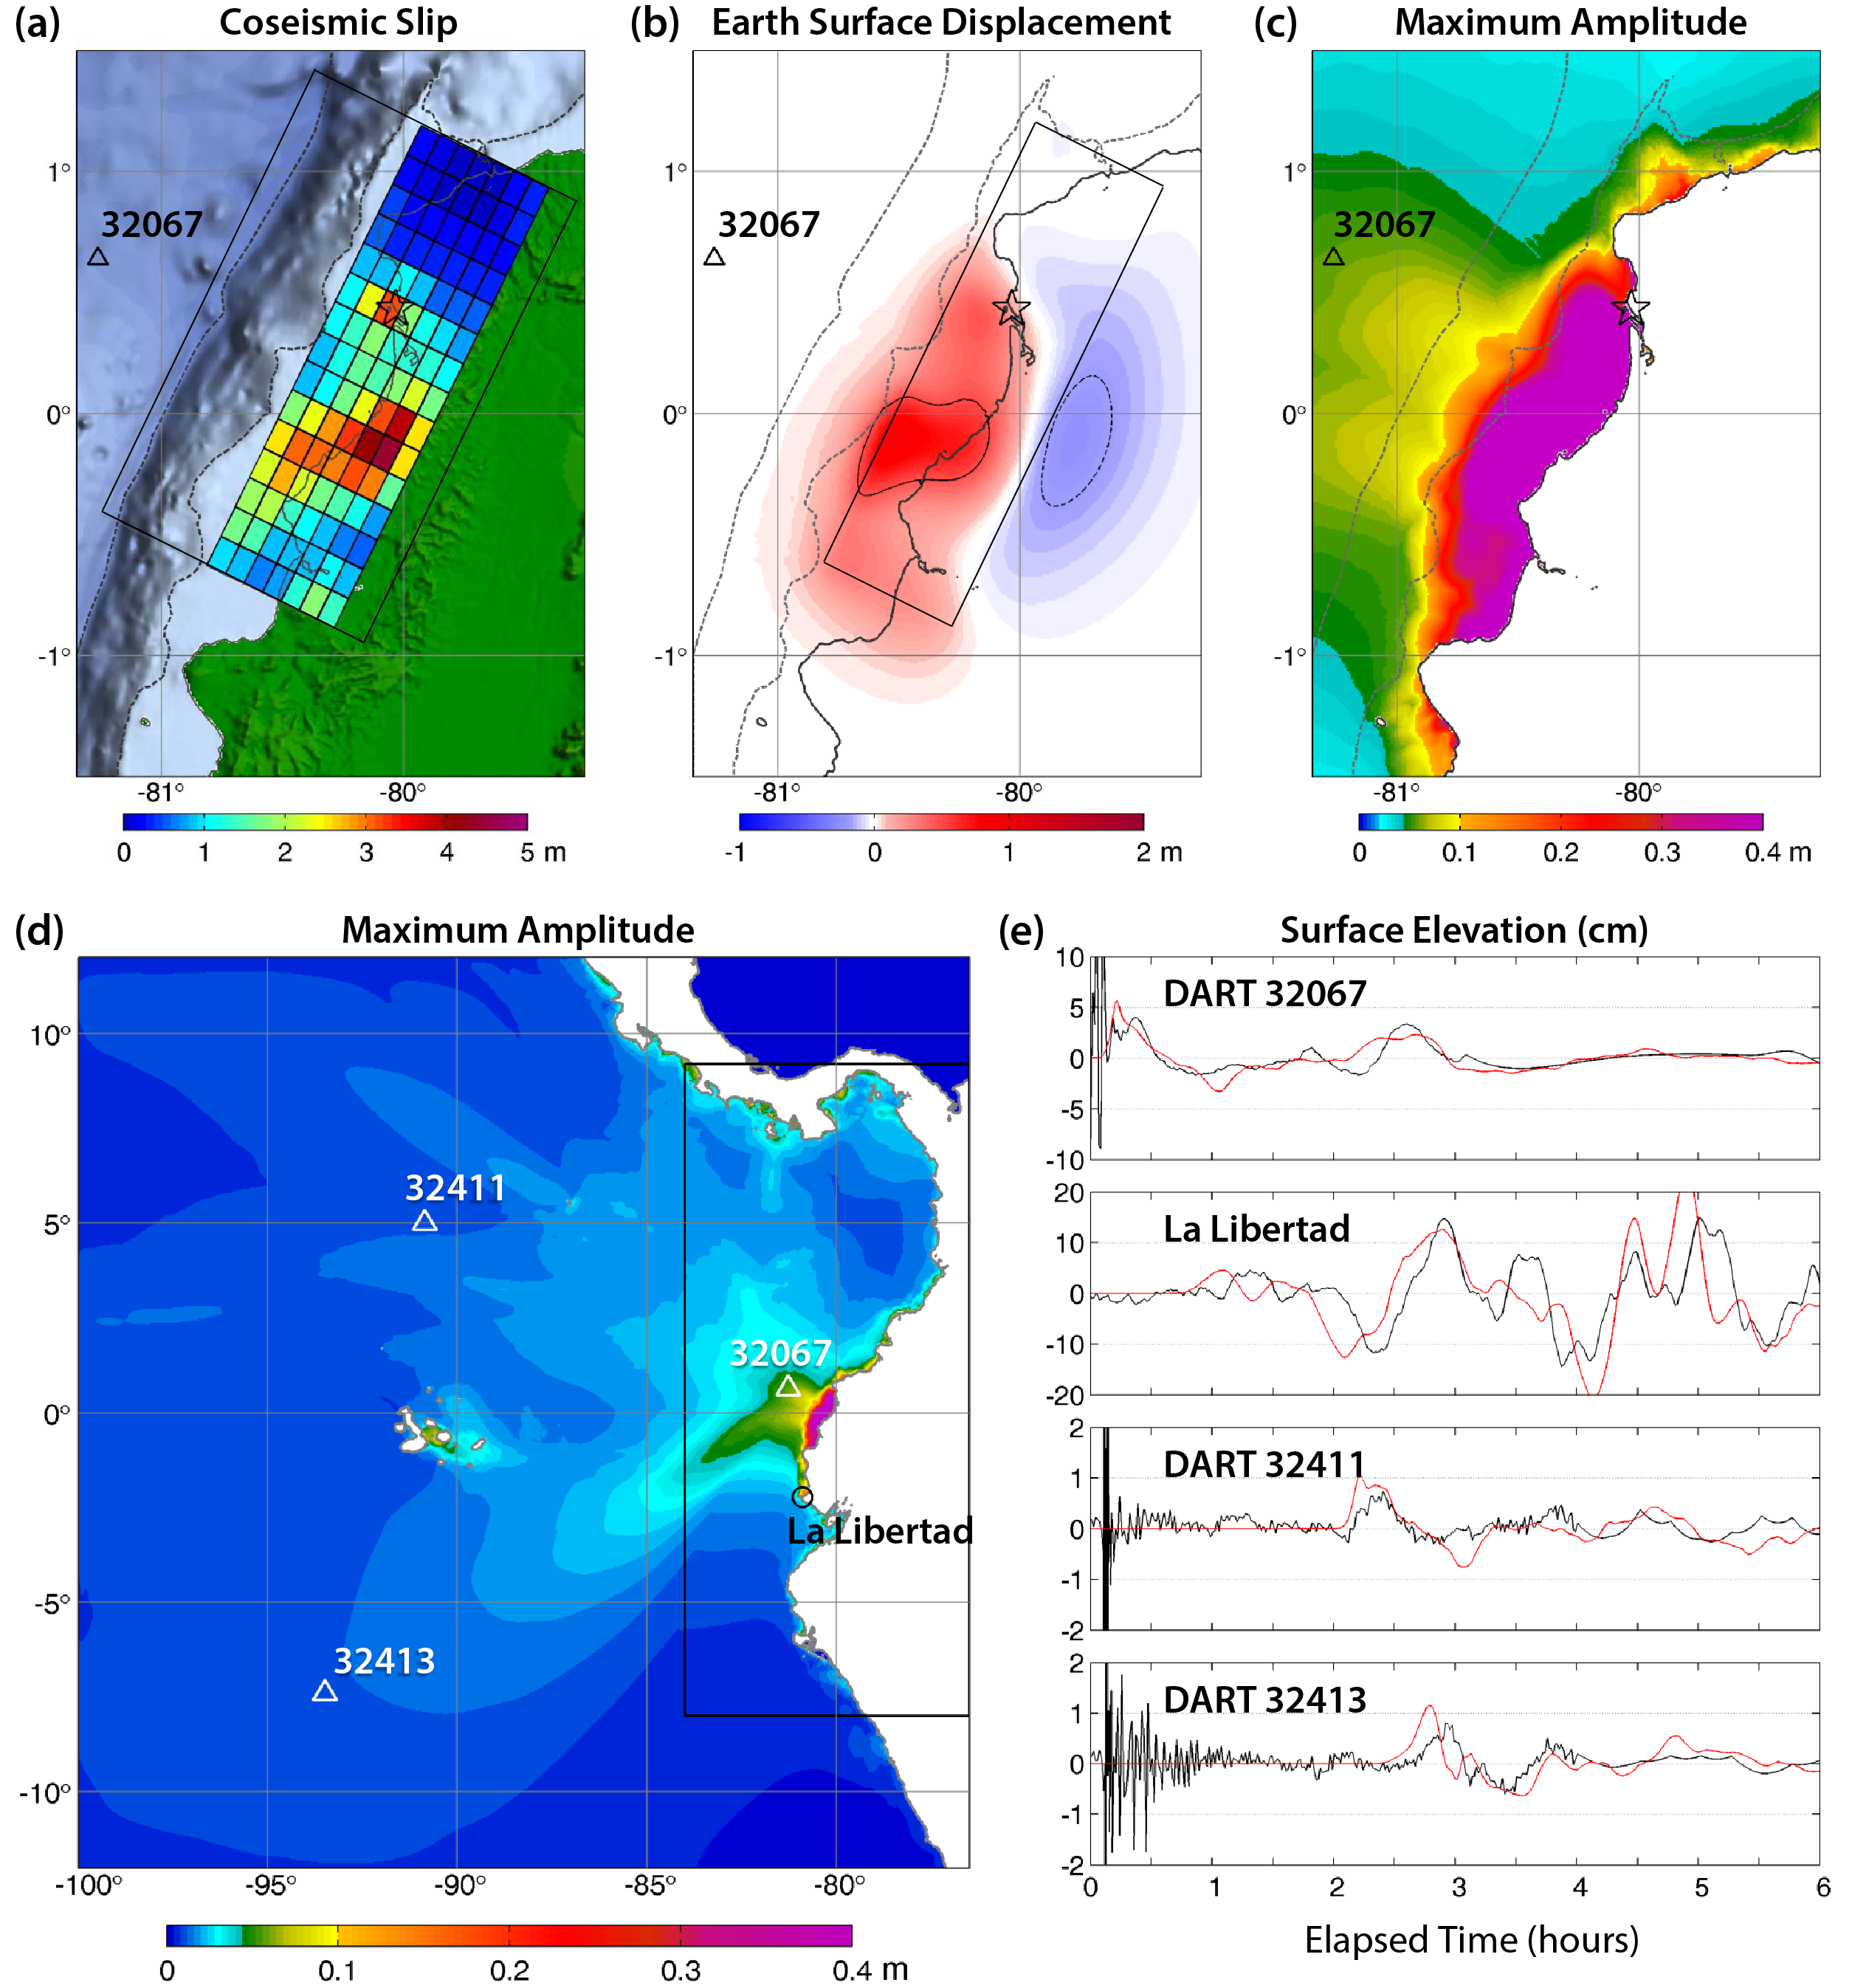


**Figure S3**. Slip model with one additional up-dip row leading to tsunami mis-fit. (a) Slip distribution for the model with an additional up-dip row in the model relative to the final model (compare to Fig. 3) and outline of the initial rupture model (black). (b) Seafloor and land surface vertical displacement. (c) Near-field tsunami wave amplitude. The dash lines denote the trench and the shelf boundary defined at 200 m depth. (d) Tsunami wave peak amplitude across the eastern Pacific. (e) Comparison of recorded (black) and computed (red) waveforms at water-level stations. Note the early computed arrivals that result from even modest amounts of slip in the shallowest row compared to the final model in Figures 1, 3 and 4.


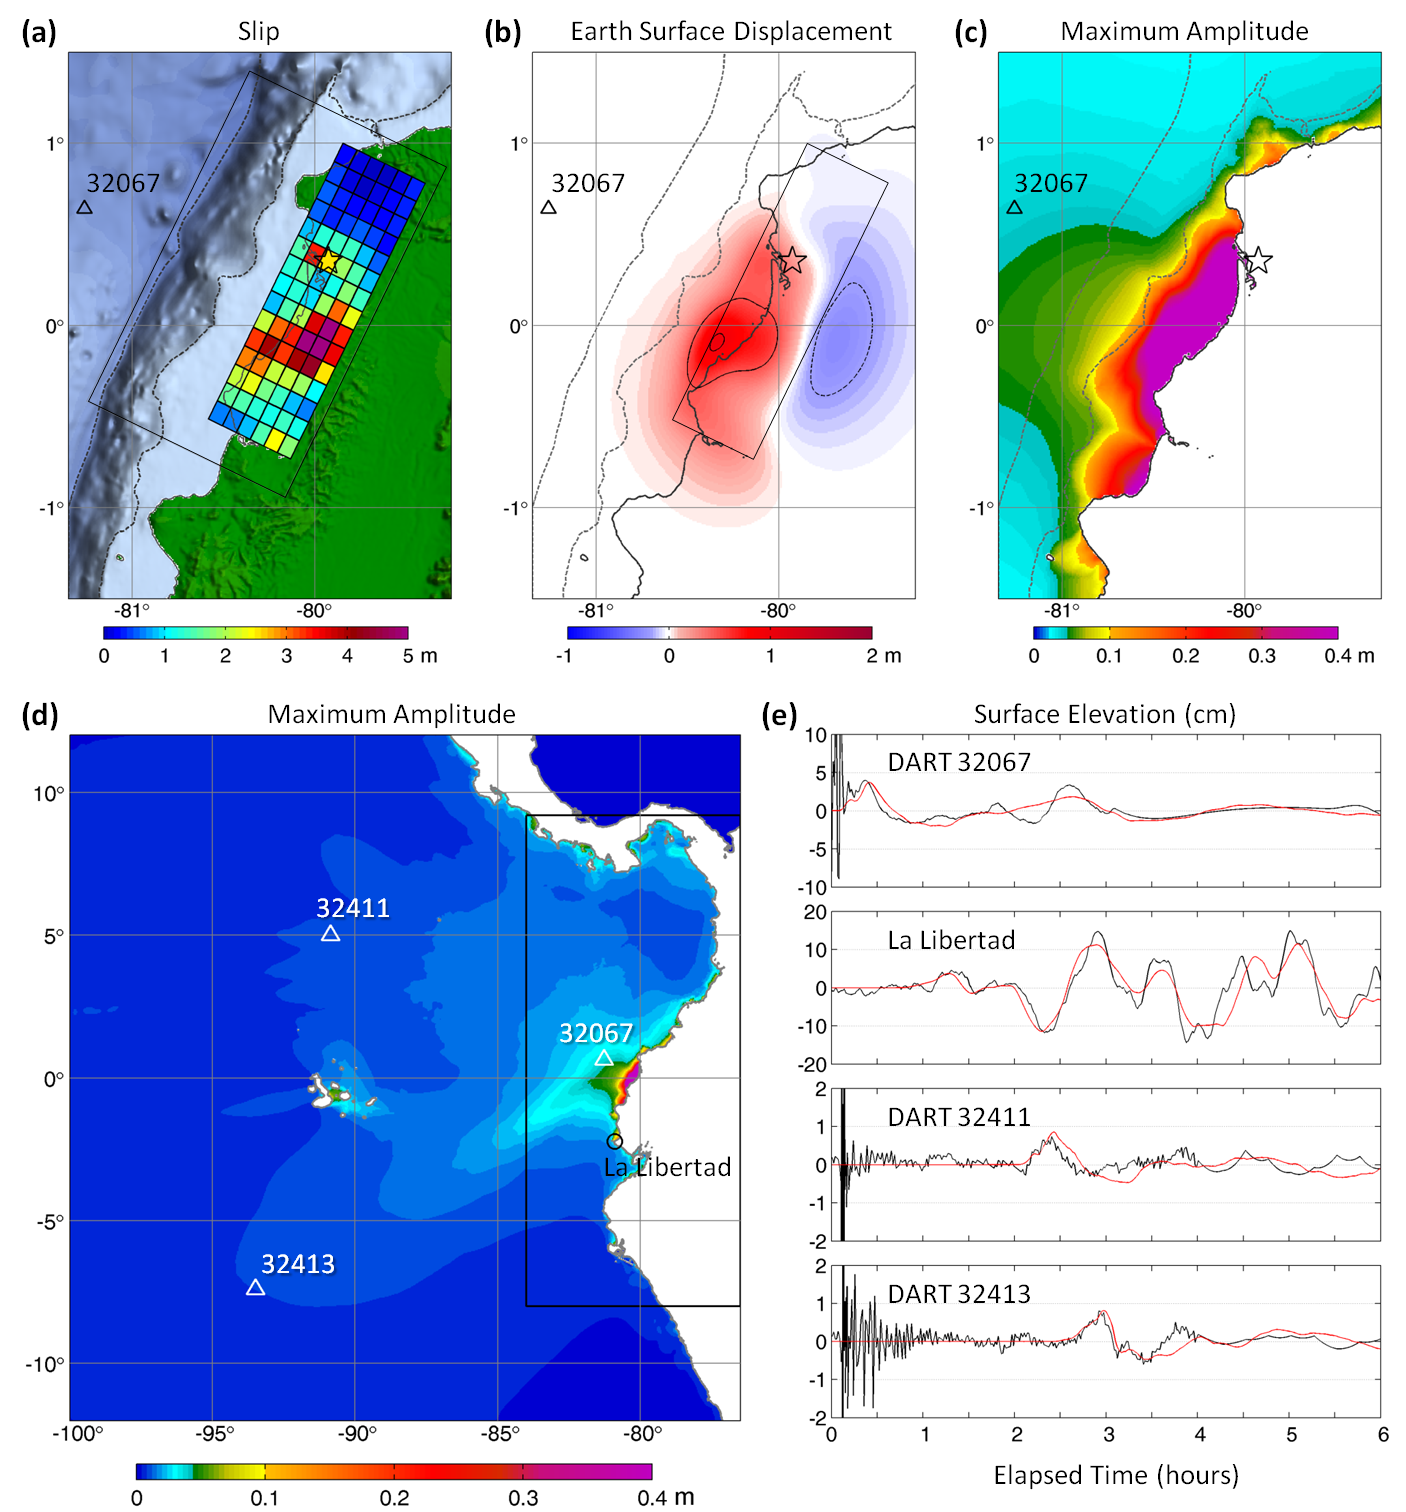


**Figure S4**. Slip model shifted ~ 10 km inland. (a) Slip distribution for the model and outline of the initial rupture model (black). (b) Seafloor and land surface vertical displacement. (c) Near-field tsunami wave amplitude. The dash lines denote the trench and the shelf boundary defined at 200 m depth. (d) Tsunami wave peak amplitude across the eastern Pacific. (e) Comparison of recorded (black) and computed (red) waveforms at water-level stations. Note the late, smooth, and small computed arrivals at DART 32067 that result from even a modest down-dip shift of the rupture compared to the final model in Figures 1, 3 and 4.


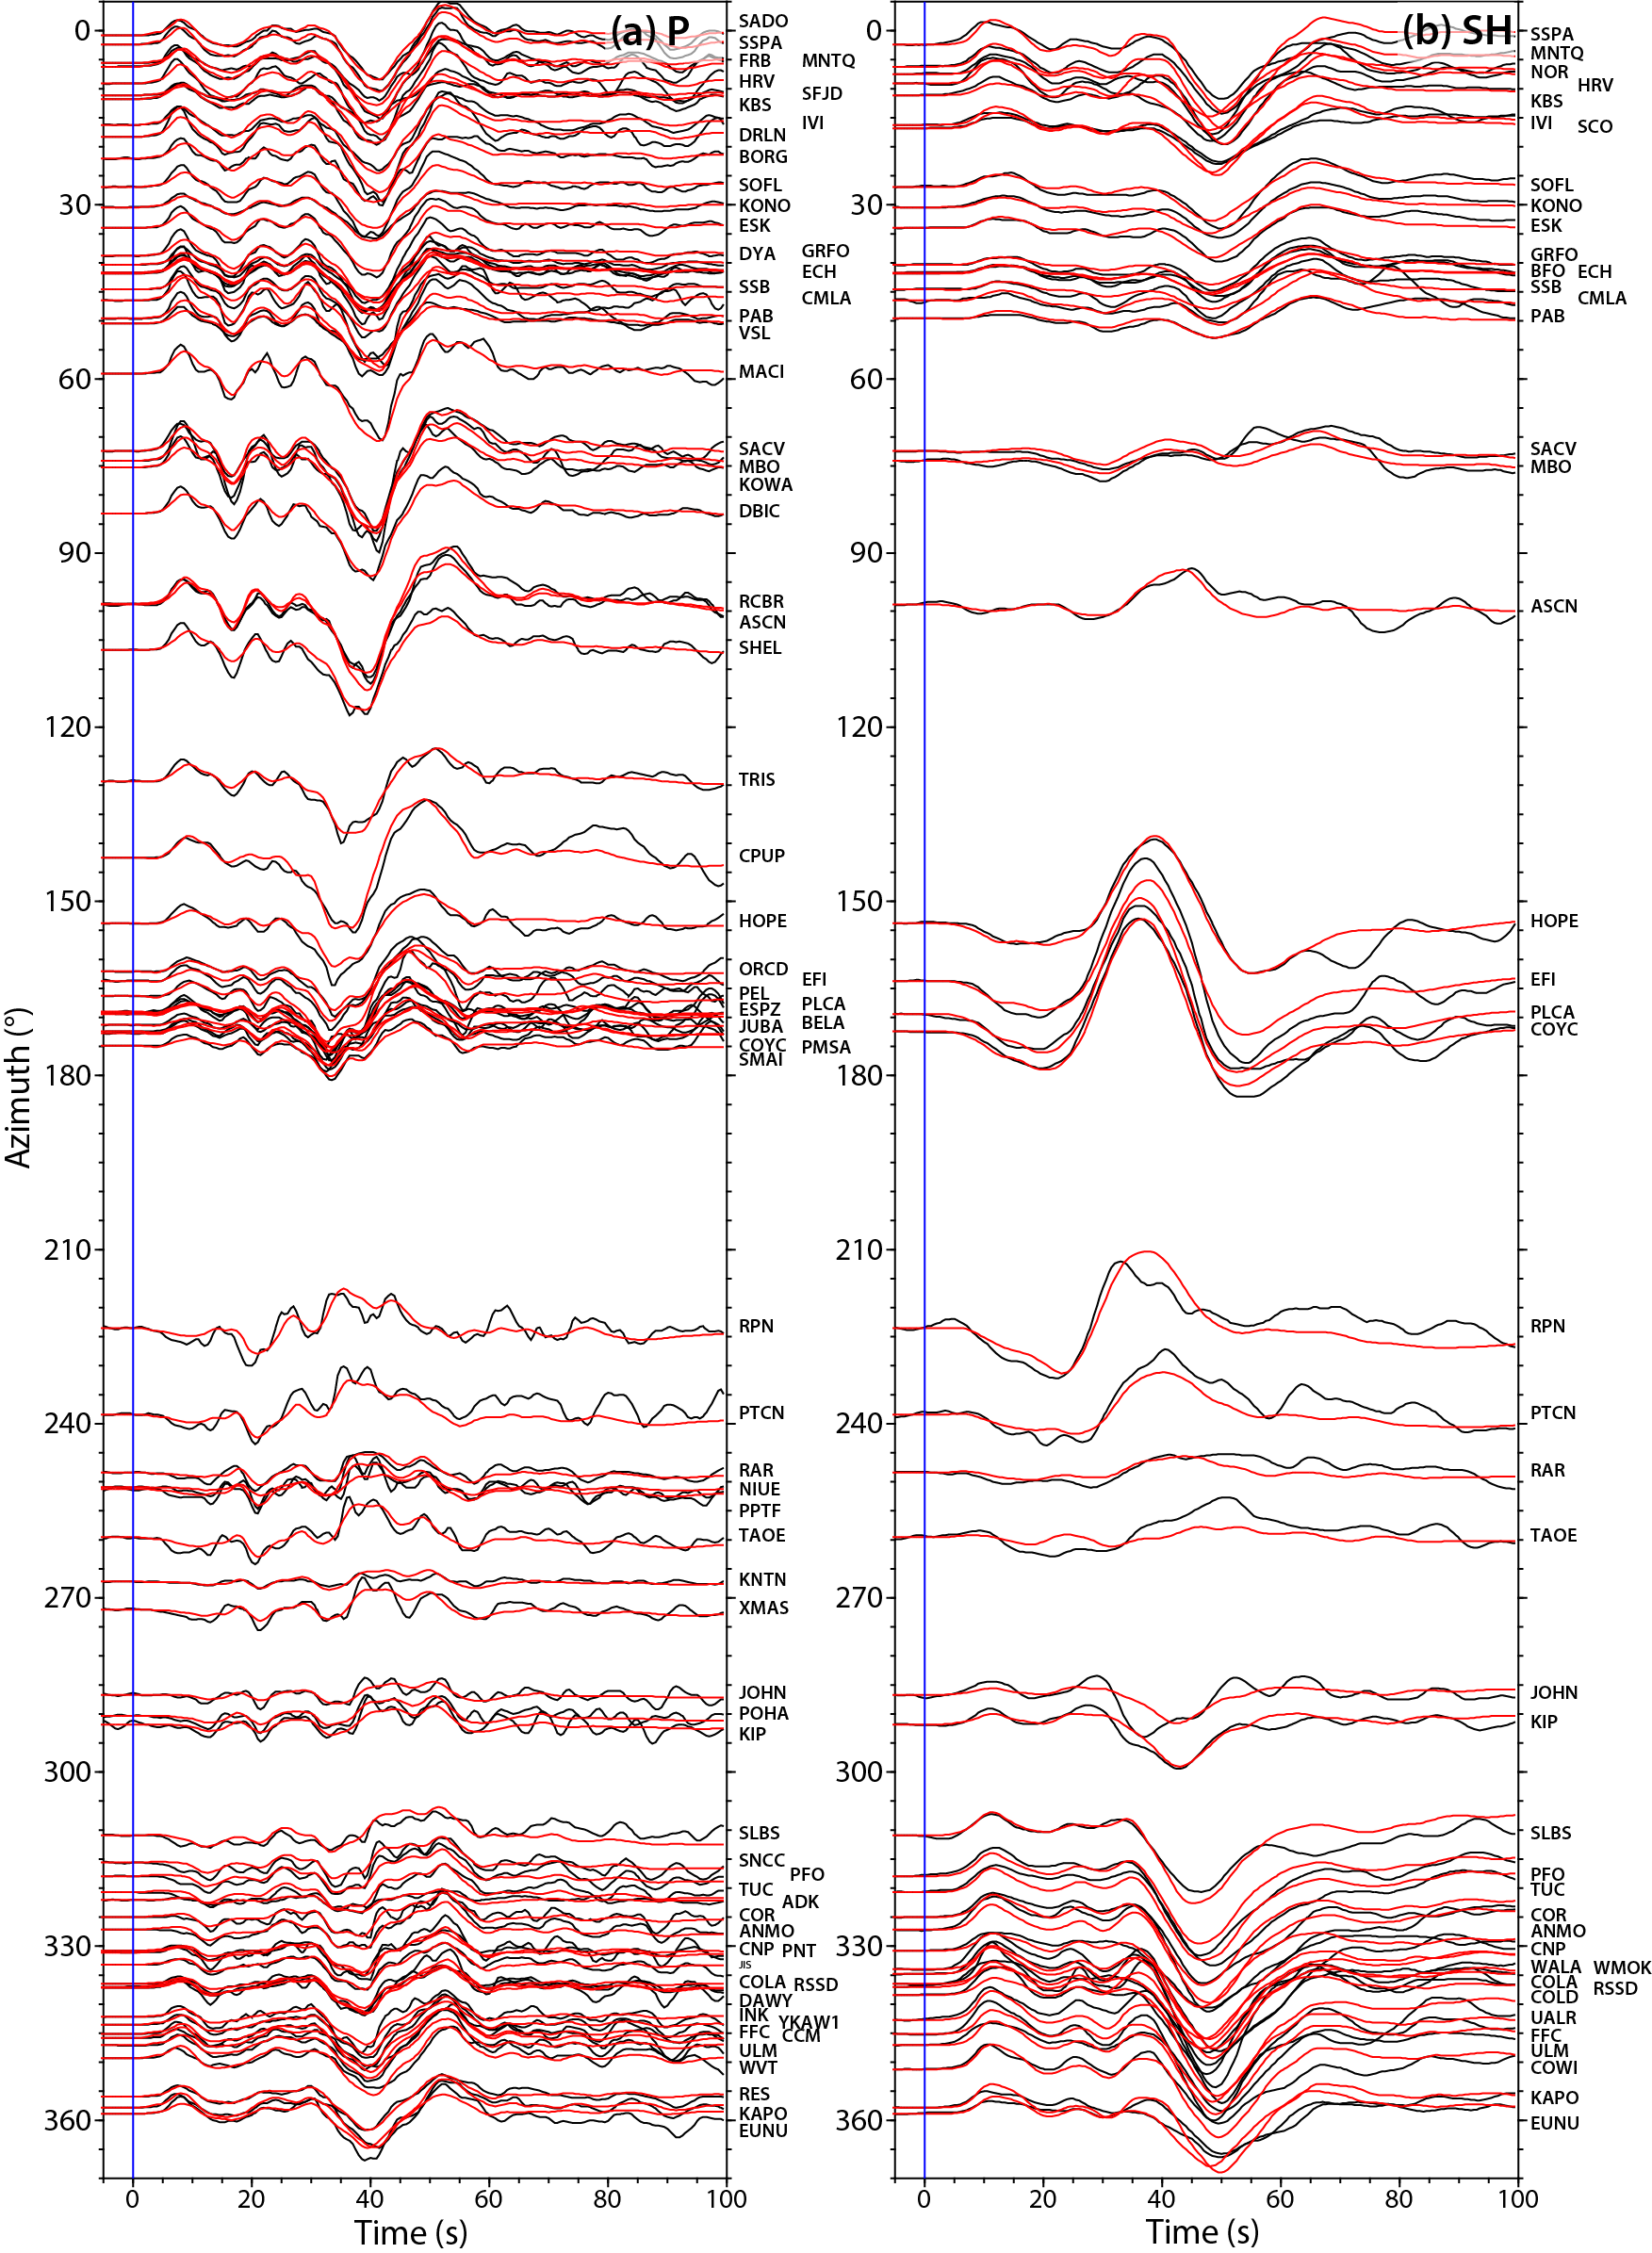


**Figure S5**. Comparison of observed (black lines) and computed (red lines) P-wave (a) and SH-wave (b) broadband ground displacement waveforms for the final slip model (Fig. 4).

**
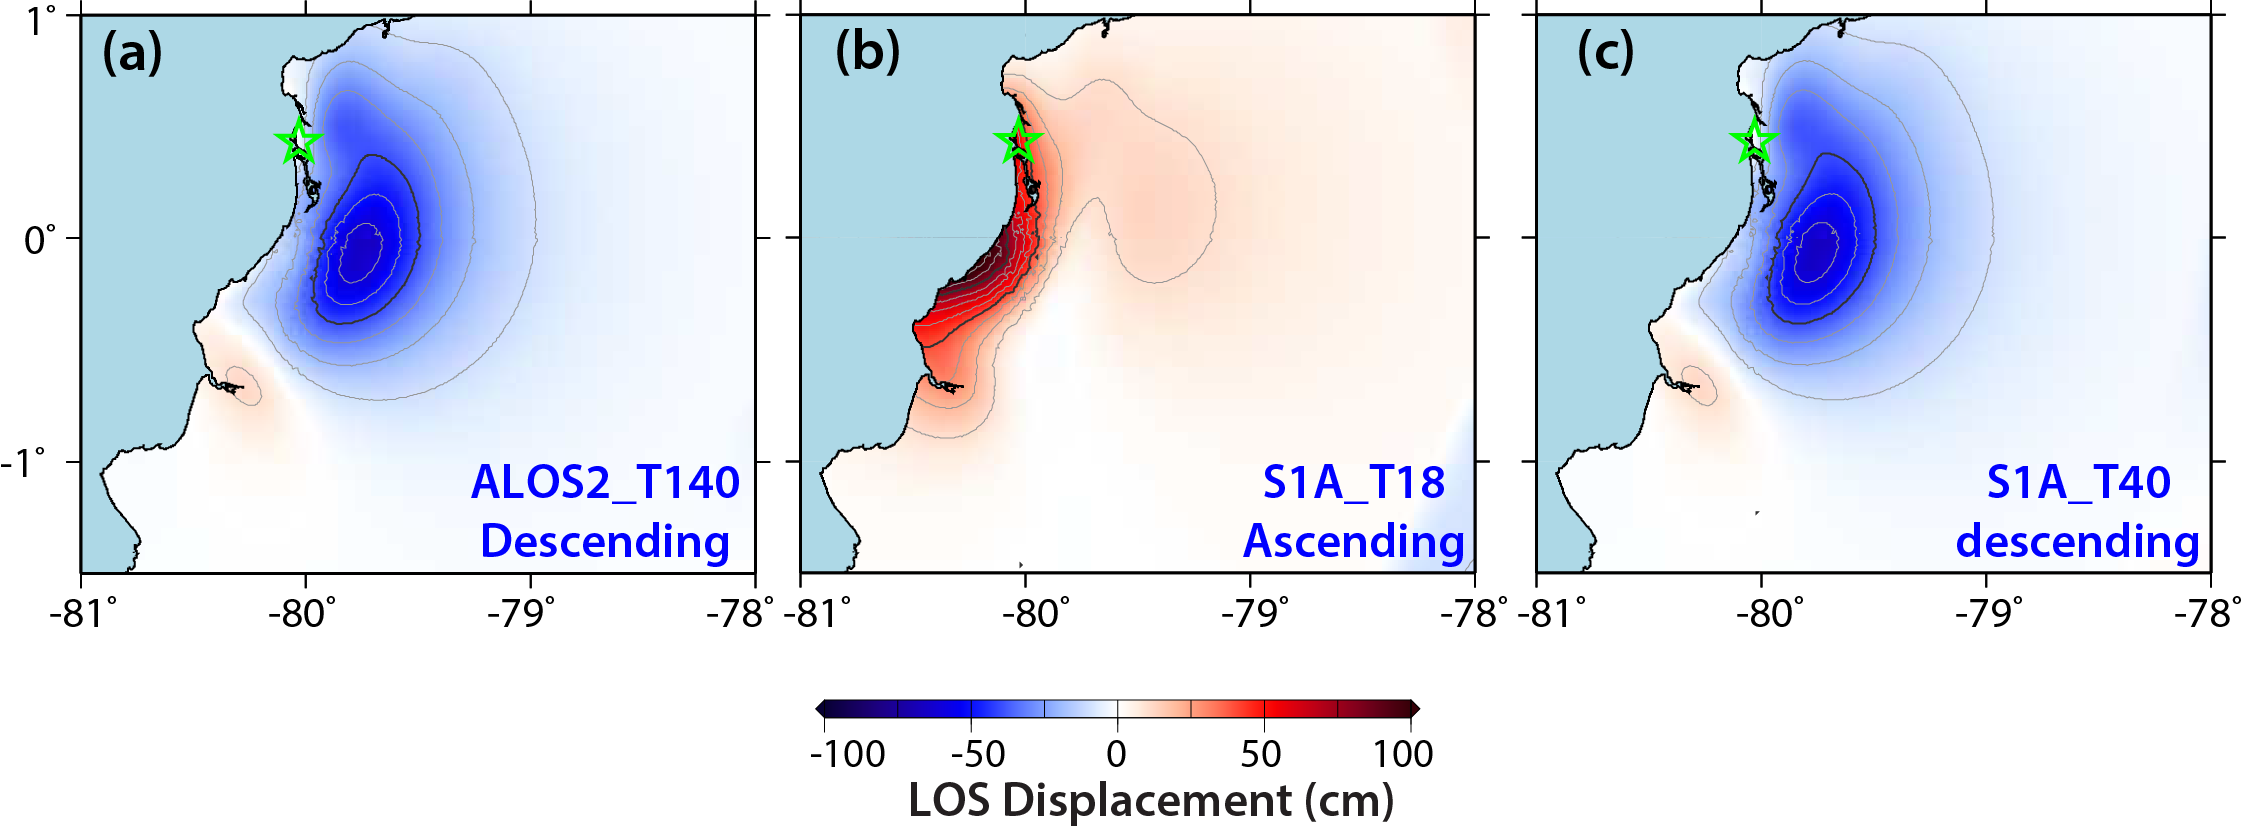
**

Figure S6. Predicted line-of-sight (LOS) displacements for InSAR ALOS-2 track140, Sentinel-1A ascending track 18 and descending track 40 from our best-fitting source model using the information about the LOS vectors provided by Xu and Sandwell (personal communication, 2016).

**
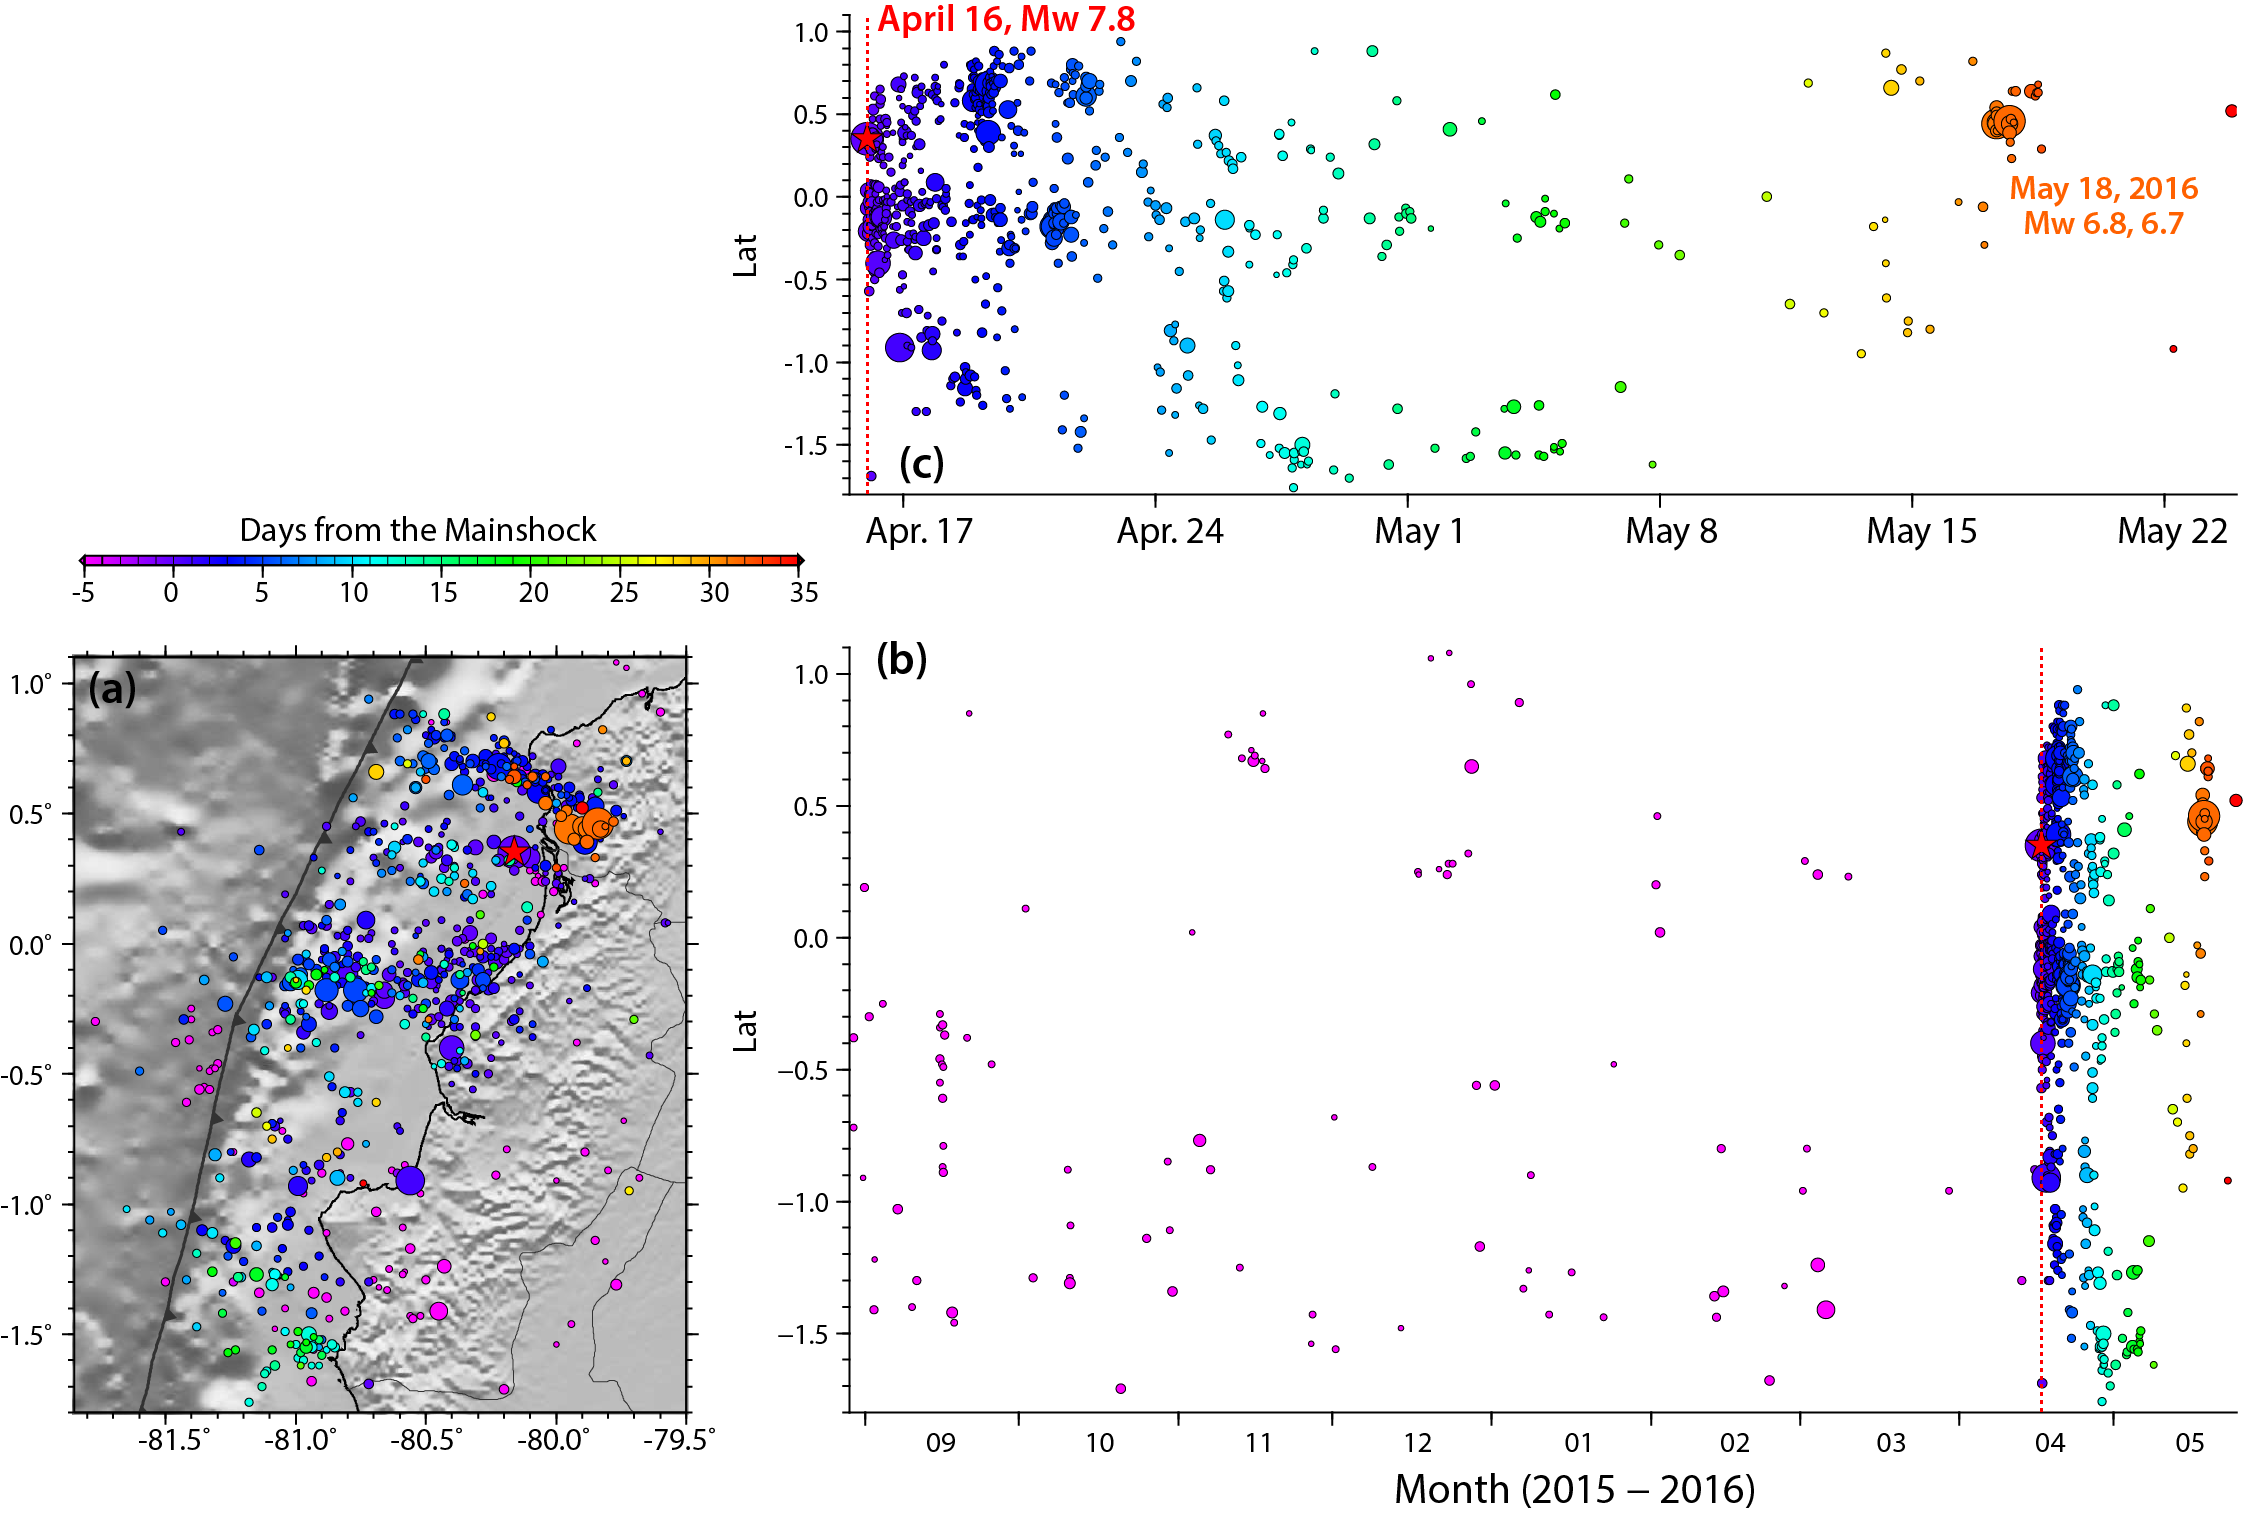
**

**Figure S7**. Foreshock and aftershock seismicity around the 2016 Ecuador Earthquake from the Geophysical Institute of the National Polytechnic School at Ecuador (<http://www.igepn.edu.ec/portal/ultimo-sismo/informe-ultimo-sismo.html>). (a) Map view of seismicity from August 2015 to May 2016 around the 2016 *Mw* 7.8 Ecuador earthquake, color-coded with time difference from the *Mw* 7.8 mainshock and scaled with earthquake magnitude. (b) and (c) Plots of seismicity time sequence from the origin time and source latitude on a scale of months (b) and days (c).


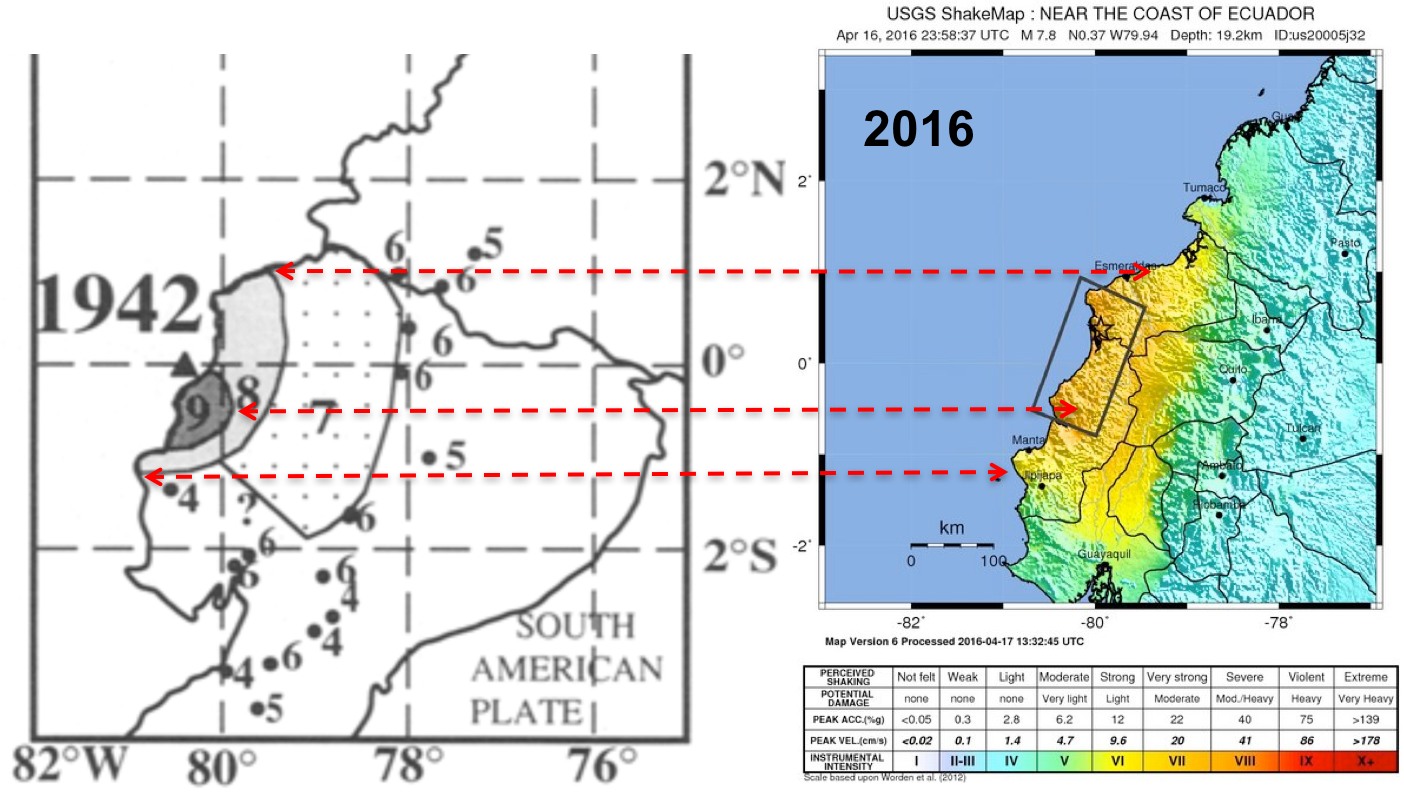


**Figure S8**. Companion of intensity produced by the 1942 (left) and 2016 (right) earthquakes. The intensity distribution for the 1942 earthquake is from *Swenson and Beck* [1996], and for the 2016 events it is from USGS/NEIC. The similarity of the intensity distributions suggests that the 1942 and 2016 events likely ruptured similar area on the megathrust.


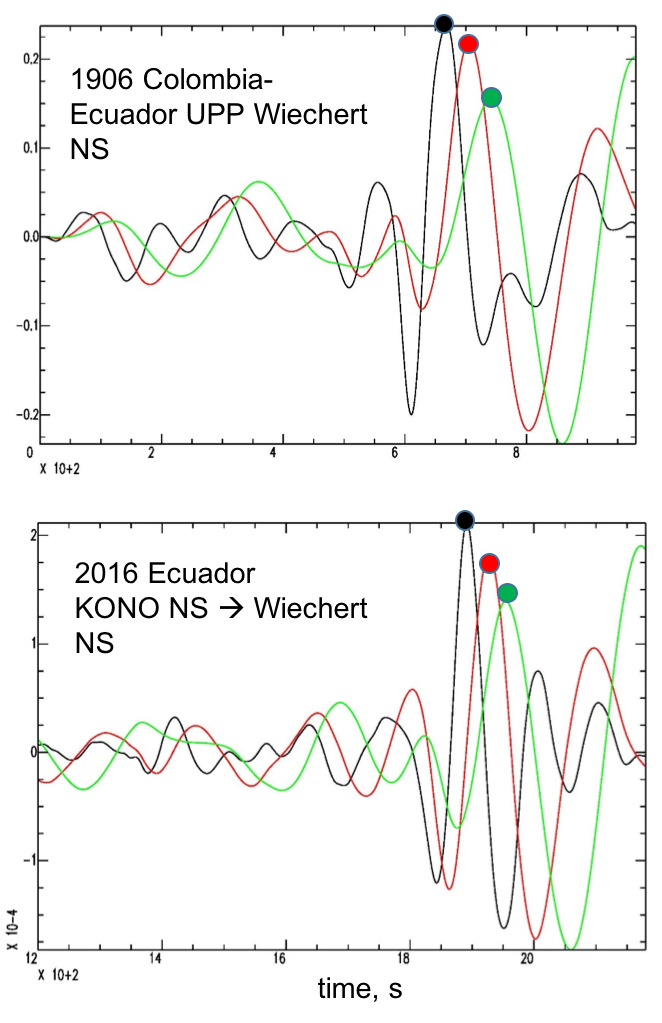


**Figure S9**. Comparison of N-S components of the 1906 and 2016 earthquakes. The black, red and green curves show the signals bandpass filtered in the frequency bands of 0.002 - 0.01 Hz, 0.002 - 0.0067 Hz and 0.002 - 0.005 Hz, respectively. The peak-to-peak amplitudes of all the band-passed records are normalized by the peak-to-peak amplitude. The similar dispersion between the two events supports our assumption that the signal for the 1906 event is the G1 Love wave.

**Table S1. Comparison of 1906 and 1979 Tsunami Runup**

| Country | Region | Lat | Lon | Distance | 1906 (*Mt*) | 1979 (*Mt*) |
| --- | --- | --- | --- | --- | --- | --- |
| COLOMBIA | GUAPI | 2.57 | -77.88 | 438 | **1.00** | **2.00** |
| COLOMBIA | TUMACO | 1.83 | -78.73 | 321 | **5.00** | **3.00** |
| JAPAN | HAKODATE | 41.72 | 140.72 | 13654 | **0.17 (8.33)** | **0.10 (8.10)** |
| JAPAN | AYUKAWA | 38.30 | 141.50 | 13822 | **0.18 (8.36)** | **0.16 (8.30)** |
| JAPAN | KUSHIMOTO | 33.47 | 135.78 | 14553 | **0.24 (8.48)** | **0.09 (8.05)** |
| US/HI | HILO | 19.73 | -155.06 | 8253 | **1.80 (8.76)** | **0.40 (8.10)** |
| US/HI | HONOLULU | 21.31 | -157.87 | 8558 | **0.25 (8.70)** | **0.16 (8.50)** |
| US/HI | KAHULUI | 20.90 | -156.48 | 8411 | **0.30** | **0.34** |

**Table S2. 1906, 1979 and 2016 Tsunami Runup**

| Country | Region | | Lat | Lon | Dist. | Travel Time | | Max Height | Mt  (Abe, 1979) |
| --- | --- | --- | --- | --- | --- | --- | --- | --- | --- |
| Hours | Min |
| 1906-01-31 Columbia (1.0°, -81.5°), Mt_average = 8.4 | | | | | | | | | |
| COLOMBIA | | GUAPI | 2.57 | -77.88 | 438 | 0 | 42 | **1.00** |  |
| COLOMBIA | | TUMACO | 1.83 | -78.73 | 321 | 0 | 30 | **5.00** |  |
| JAPAN | | HAKODATE | 41.72 | 140.72 | 13654 | 19 | 24 | **0.17** | 8.33 |
| JAPAN | | AYUKAWA | 38.30 | 141.50 | 13822 | 19 | 48 | **0.18** | 8.36 |
| JAPAN | | HOSOSHIMA | 32.43 | 131.67 | 14925 | 20 | 18 | **0.15** | 8.28 |
| JAPAN | | FUKAHORI | 32.68 | 129.82 | 15037 |  |  | **0.28** | 8.55 |
| JAPAN | | NAGASAKI | 32.73 | 129.87 | 15030 | 21 | 33 | **0.14** | 8.25 |
| JAPAN | | KUSHIMOTO | 33.47 | 135.78 | 14553 | 20 | 27 | **0.24** | 8.48 |
| New Zealand | | GISBORNE | -38.68 | 178.02 | 10988 | 26 | 25 | **0.60** |  |
| PANAMA | | NAOS_Is | 8.92 | -79.53 | 907 |  |  | **0.70** |  |
| US/CA | | SAN_Diego | 32.72 | -117.17 | 5133 |  |  | **0.05** | 8.00 |
| US/CA | | SAN_Francisco | 37.81 | -122.47 | 5852 |  |  | **0.06** | 8.08 |
| US/HI | | HILO | 19.73 | -155.06 | 8253 | 12 | 30 | **1.80** | 8.76 |
| US/HI | | HONOLULU | 21.31 | -157.87 | 8558 | 11 | 42 | **0.25** | 8.70 |
| US/HI | | KAHULUI | 20.90 | -156.48 | 8411 |  |  | **0.30** |  |
| 2016-01-31 Ecuador (0.35°, -79.93°) | | | | | | | | | |
| ECUADOR | | D32067 | 0.64 | -81.26 | 372 | 0 | 5 |  |  |
| ECUADOR | | Santa Cruz Is. | -0.75 | -90.31 | 1255 | 3 | 2 |  |  |
| ECUADOR | | LA LIBERTAD | -2.23 | -80.90 | 669 |  |  |  |  |

**Table S2 continuous. 1979 Tsunami Runup**

| Country | Region | Lat | Lon | Dist. | Max Height | Mt (Abe, 1979) |
| --- | --- | --- | --- | --- | --- | --- |
| 1979-12-12 Columbia (1.0°, -79.5°), Mt_average = 8.1 | | | | | | |
| COLOMBIA | BUENAVENTURA | 3.89 | -77.07 | 360 | **0.14** |  |
| COLOMBIA | EL_BARRO | 2.60 | -77.70 | 215 | **1.00** |  |
| COLOMBIA | EL_CHARCO | 2.71 | -77.66 | 225 | **2.00** |  |
| COLOMBIA | GUAPI | 2.60 | -77.90 | 197 | **2.00** |  |
| COLOMBIA | ISCUANDE | 2.44 | -77.97 | 181 | **2.00** |  |
| COLOMBIA | ISKA GORGONA | 3.00 | -78.32 | 194 | **5.00** |  |
| COLOMBIA | LIMONES | 2.61 | -77.80 | 207 | **2.00** |  |
| COLOMBIA | SAN JUAN LA | 2.33 | -78.60 | 117 | **6.00** |  |
| COLOMBIA | TIMBIQUI | 2.76 | -77.63 | 232 | **1.00** |  |
| COLOMBIA | TUMACO | 1.83 | -78.73 | 74 | **3.00** |  |
| COLOMBIA | VUELTA LARGA | 2.65 | -77.90 | 200 | **3.00** |  |
| COSTA RICA | PUNTARENAS | 9.97 | -84.83 | 1110 | **0.13** |  |
| FRENCH | PAPEETE TAHITI | -17.53 | -149.57 | 7973 | **0.16** |  |
| JAPAN | HACHINOHE | 40.53 | 141.53 | 13769 | **0.21** | 8.42 |
| JAPAN | HACHINOHE | 40.52 | 141.52 | 13771 | **0.11** | 8.14 |
| JAPAN | MUTSUOGAWARA | 40.93 | 141.40 | 13750 | **0.06** | 7.88 |
| JAPAN | CHICHIJIMA Is. | 27.09 | 142.19 | 14547 | **0.19** | 8.38 |
| JAPAN | MERA | 34.92 | 139.83 | 14267 | **0.07** | 7.95 |
| JAPAN | ONAHAMA | 36.93 | 140.90 | 14056 | **0.15** | 8.28 |
| JAPAN | HAKODATE | 41.72 | 140.72 | 13739 | **0.10** | 8.10 |
| JAPAN | HANASAKI | 43.28 | 145.57 | 13319 | **0.12** | 8.18 |
| JAPAN | KUSHIRO | 42.98 | 144.37 | 13417 | **0.09** | 8.05 |
| JAPAN | TOKACHIKO | 42.30 | 143.33 | 13530 | **0.25** | 8.50 |
| JAPAN | URAKAWA | 42.17 | 142.77 | 13576 | **0.12** | 8.18 |
| JAPAN | HITACHIKO | 36.50 | 140.63 | 14104 | **0.13** | 8.21 |
| JAPAN | KAMAISHI | 39.27 | 141.88 | 13831 | **0.17** | 8.33 |
| JAPAN | MIYAKO | 39.65 | 141.98 | 13799 | **0.15** | 8.28 |
| JAPAN | OFUNATO | 39.02 | 141.75 | 13857 | **0.18** | 8.36 |
| JAPAN | SHIMANOKOSHIGYOKO | 39.90 | 141.93 | 13785 | **0.24** | 8.48 |
| JAPAN | NAZE | 28.38 | 129.50 | 15483 | **0.10** | 8.10 |
| JAPAN | MUROTOMISAKI | 33.27 | 134.17 | 14788 | **0.05** | 7.80 |
| JAPAN | TOSA-SHIMIZU | 32.78 | 132.96 | 14909 | **0.10** | 8.10 |
| JAPAN | OWASE | 34.08 | 136.20 | 14586 | **0.11** | 8.14 |
| JAPAN | OWASE | 34.08 | 136.20 | 14586 | **0.12** | 8.18 |
| JAPAN | TOBA | 34.48 | 136.82 | 14514 | **0.12** | 8.18 |
| JAPAN | AYUKAWA | 38.30 | 141.50 | 13922 | **0.16** | 8.30 |
| JAPAN | ENOSHIMA | 38.40 | 141.60 | 13909 | **0.03** | 7.58 |
| JAPAN | ABURATSU | 31.58 | 131.42 | 15106 | **0.13** | 8.21 |
| JAPAN | MINAMI-IZU | 34.62 | 138.88 | 14356 | **0.06** | 7.88 |
| JAPAN | OMAEZAKI | 34.61 | 138.22 | 14405 | **0.09** | 8.05 |
| JAPAN | TOKYO | 35.65 | 139.77 | 14223 | **0.05** | 7.80 |
| JAPAN | YAENE HACHIJO | 33.10 | 139.77 | 14390 | **0.06** | 7.88 |
| JAPAN | KUSHIMOTO | 33.47 | 135.78 | 14659 | **0.09** | 8.05 |
| JAPAN | URAGAMI | 33.55 | 135.90 | 14645 | **0.11** | 8.14 |
| MEXICO | MANZANILLO | 19.05 | -104.33 | 3342 | **0.50** |  |
| MEXICO | ACAPULCO | 16.83 | -99.92 | 2816 | **0.30** |  |
| US/HI | HILO | 19.73 | -155.06 | 8454 | **0.40** | 8.10 |
| US/HI | HONOLULU | 21.31 | -157.87 | 8755 | **0.16** | 8.50 |
| US/HI | KAHULUI | 20.90 | -156.48 | 8609 | **0.34** |  |
| US/HI | NAWILIWILI | 21.93 | -159.36 | 8913 | **0.14** |  |
| US/HI | JOHNSTON | 16.74 | -169.53 | 9977 | **0.10** |  |

**Table S3. Surface Wave Magnitude**

| Station | Sta_lat(°) | Sta_lon(°) | Dist (°) | Az(°) | Amp (μm) | *Ms* |
| --- | --- | --- | --- | --- | --- | --- |
| 1906-01-31 Columbia (1°, -81.5°), Ms_average = 8.6 | | | | | | |
| Jena | 50.93 | 11.60 | 91.2 | 39.2 | 4242**+** | 8.69 |
| Osaka | 34.70 | 135.52 | 130.3 | 319.4 | 3000 | 8.8 |
| Mizusawa | 39.13 | 141.13 | 124.1 | 320.5 | 1544* | 8.47 |
| Potsdam | 52.38 | 13.07 | 92.0 | 37.7 | 5000 | 8.9 |
| Leipzig | 51.33 | 12.40 | 91.7 | 38.8 | 4000 | 8.8 |
| Sitka | 57.05 | -135.33 | 70.3 | 332.1 | 7000 | 8.9 |
| Vieques | 18.15 | -65.44 | 23.3 | 41.9 | 10000 | 8.0 |
| Cheltenham | 38.73 | -76.85 | 37.9 | 5.9 | 2360**+** | 7.83 |
| Honolulu | 21.30 | -157.82 | 76.9 | 291.5 | 6000 | 8.9 |
| Christch | -43.53 | 172.62 | 102.2 | 225.7 | 2000 | 8.7 |
| Zikawei | 31.20 | 121.43 | 141.2 | 327.8 | 4000 | 8.9 |
| Bombay | 18.90 | 72.82 | 147.9 | 50.6 | 2000 | 8.7 |
| Tiflis | 41.72 | 44.80 | 115.5 | 42.0 | 1000 | 8.4 |
| (Sources: Gutenberg notepad; * from original records;+ from station bulletin) | | | | | | |
| 1942-05-14 Ecuador (-3/4°, -81.5°), Ms_average = 7.9 | | | | | | |
| HAI | 36.13 | -117.98 | 50.4 | 319.7 | 2? | 7.6 |
| HAI | 36.13 | -117.98 | 50.4 | 319.7 | 1000 | 8.2 |
| RIV | -33.83 | 51.17 | 123.2 | 131.5 | 400 | 7.9 |
| PERTH | -31.95 | 15.83 | 94.9 | 121.9 | 1400 | 8.5 |
| UPP | 59.85 | 17.64 | 93.8 | 30.1 | 240(?) | 7.6 |
| C? |  |  |  |  | 200 | 7.8 |
| A? |  |  | 130 |  | 3? | 7.6 |
| (Source: Gutenberg notepad) | | | | | | |
| 1958-01-19 Ecuador (1.0°, -79.5°), Ms_average = 7.3 | | | | | | |
| PAS | 34.15 | -118.17 | 49.0 | 316.6 | 100 | 6.9 |
| Aberdeen | 57.17 | -2.10 | 82.3 | 32.4 | 200 | 7.3 |
| Bucarest | 44.41 | 26.10 | 100.4 | 44.6 | 150 | 7.3 |
| Berkley | 37.93 | -122.25 | 53.8 | 318.3 | 330 | 7.3 |
| KEW | 51.47 | -0.32 | 82.5 | 38.3 | 200 | 7.3 |
| LaPlate | -34.90 | -57.93 | 41.1 | 152.6 | 800 | 7.4 |
| Praha | 50.08 | 14.42 | 91.8 | 40.0 | 300 | 7.6 |
| UPP | 59.85 | 17.64 | 92.7 | 30.1 | 200 | 7.4 |
| Kirurna | 67.85 | 20.22 | 92.7 | 22.0 | 300 | 7.6 |
| (Source: Gutenberg notepad) | | | | | | |

**Table S3. Continuous**

| 1979-12-12 Columbia (1°, -79.5°), Ms_average = 7.7 | | | | | | |
| --- | --- | --- | --- | --- | --- | --- |
| ALQ |  |  | 41.7 | 326 | 430 | 7.3 |
| GOL |  |  | 44.7 | 331 | 100 | 7.8 |
| PAS |  |  | 48.6 | 316 | 321 | 7.3 |
| PAS |  |  | 48.6 | 316 | 473 | 7.5 |
| BKS |  |  | 53.4 | 318 | 490 | 7.6 |
| BKS |  |  | 53.4 | 318 | 560 | 7.6 |
| MSO |  |  | 54.2 | 331 | 436 | 7.6 |
| NEW |  |  | 56.7 | 331 | 450 | 7.6 |
| NEW |  |  | 56.7 | 331 | 350 | 7.7 |
| PMR |  |  | 79.1 | 333 | 50 | 8.2 |
| COL |  |  | 79.5 | 336 | 52 | 6.9 |
| DBN |  |  | 85.4 | 38 | 680 | 8.0 |
| STU |  |  | 87.8 | 41 | 148 | 7.4 |
| GRF |  |  | 89.1 | 41 | 557 | 8.0 |
| MOX |  |  | 89.4 | 40 | 34 | 8.2 |
| MOX |  |  | 89.4 | 40 | 323 | 7.9 |
| HFS |  |  | 90.1 | 30 | 624 | 8.1 |
| SPA |  |  | 91.6 | 180 | 67 | 7.1 |
| KRA |  |  | 94.7 | 40 | 90 | 7.3 |
| KRA |  |  | 94.7 | 40 | 373 | 8.0 |
| SPC |  |  | 95.1 | 41 | 464 | 8.0 |
| GRM |  |  | 104.2 | 124 | 125 | 7.5 |
| PRE |  |  | 106.5 | 116 | 37 | 7.0 |
| SSE |  |  | 142.1 | 331 | 302 | 8.4 |
| (Source: USGS/NEIC) | | | | | | |

**Animations**

**
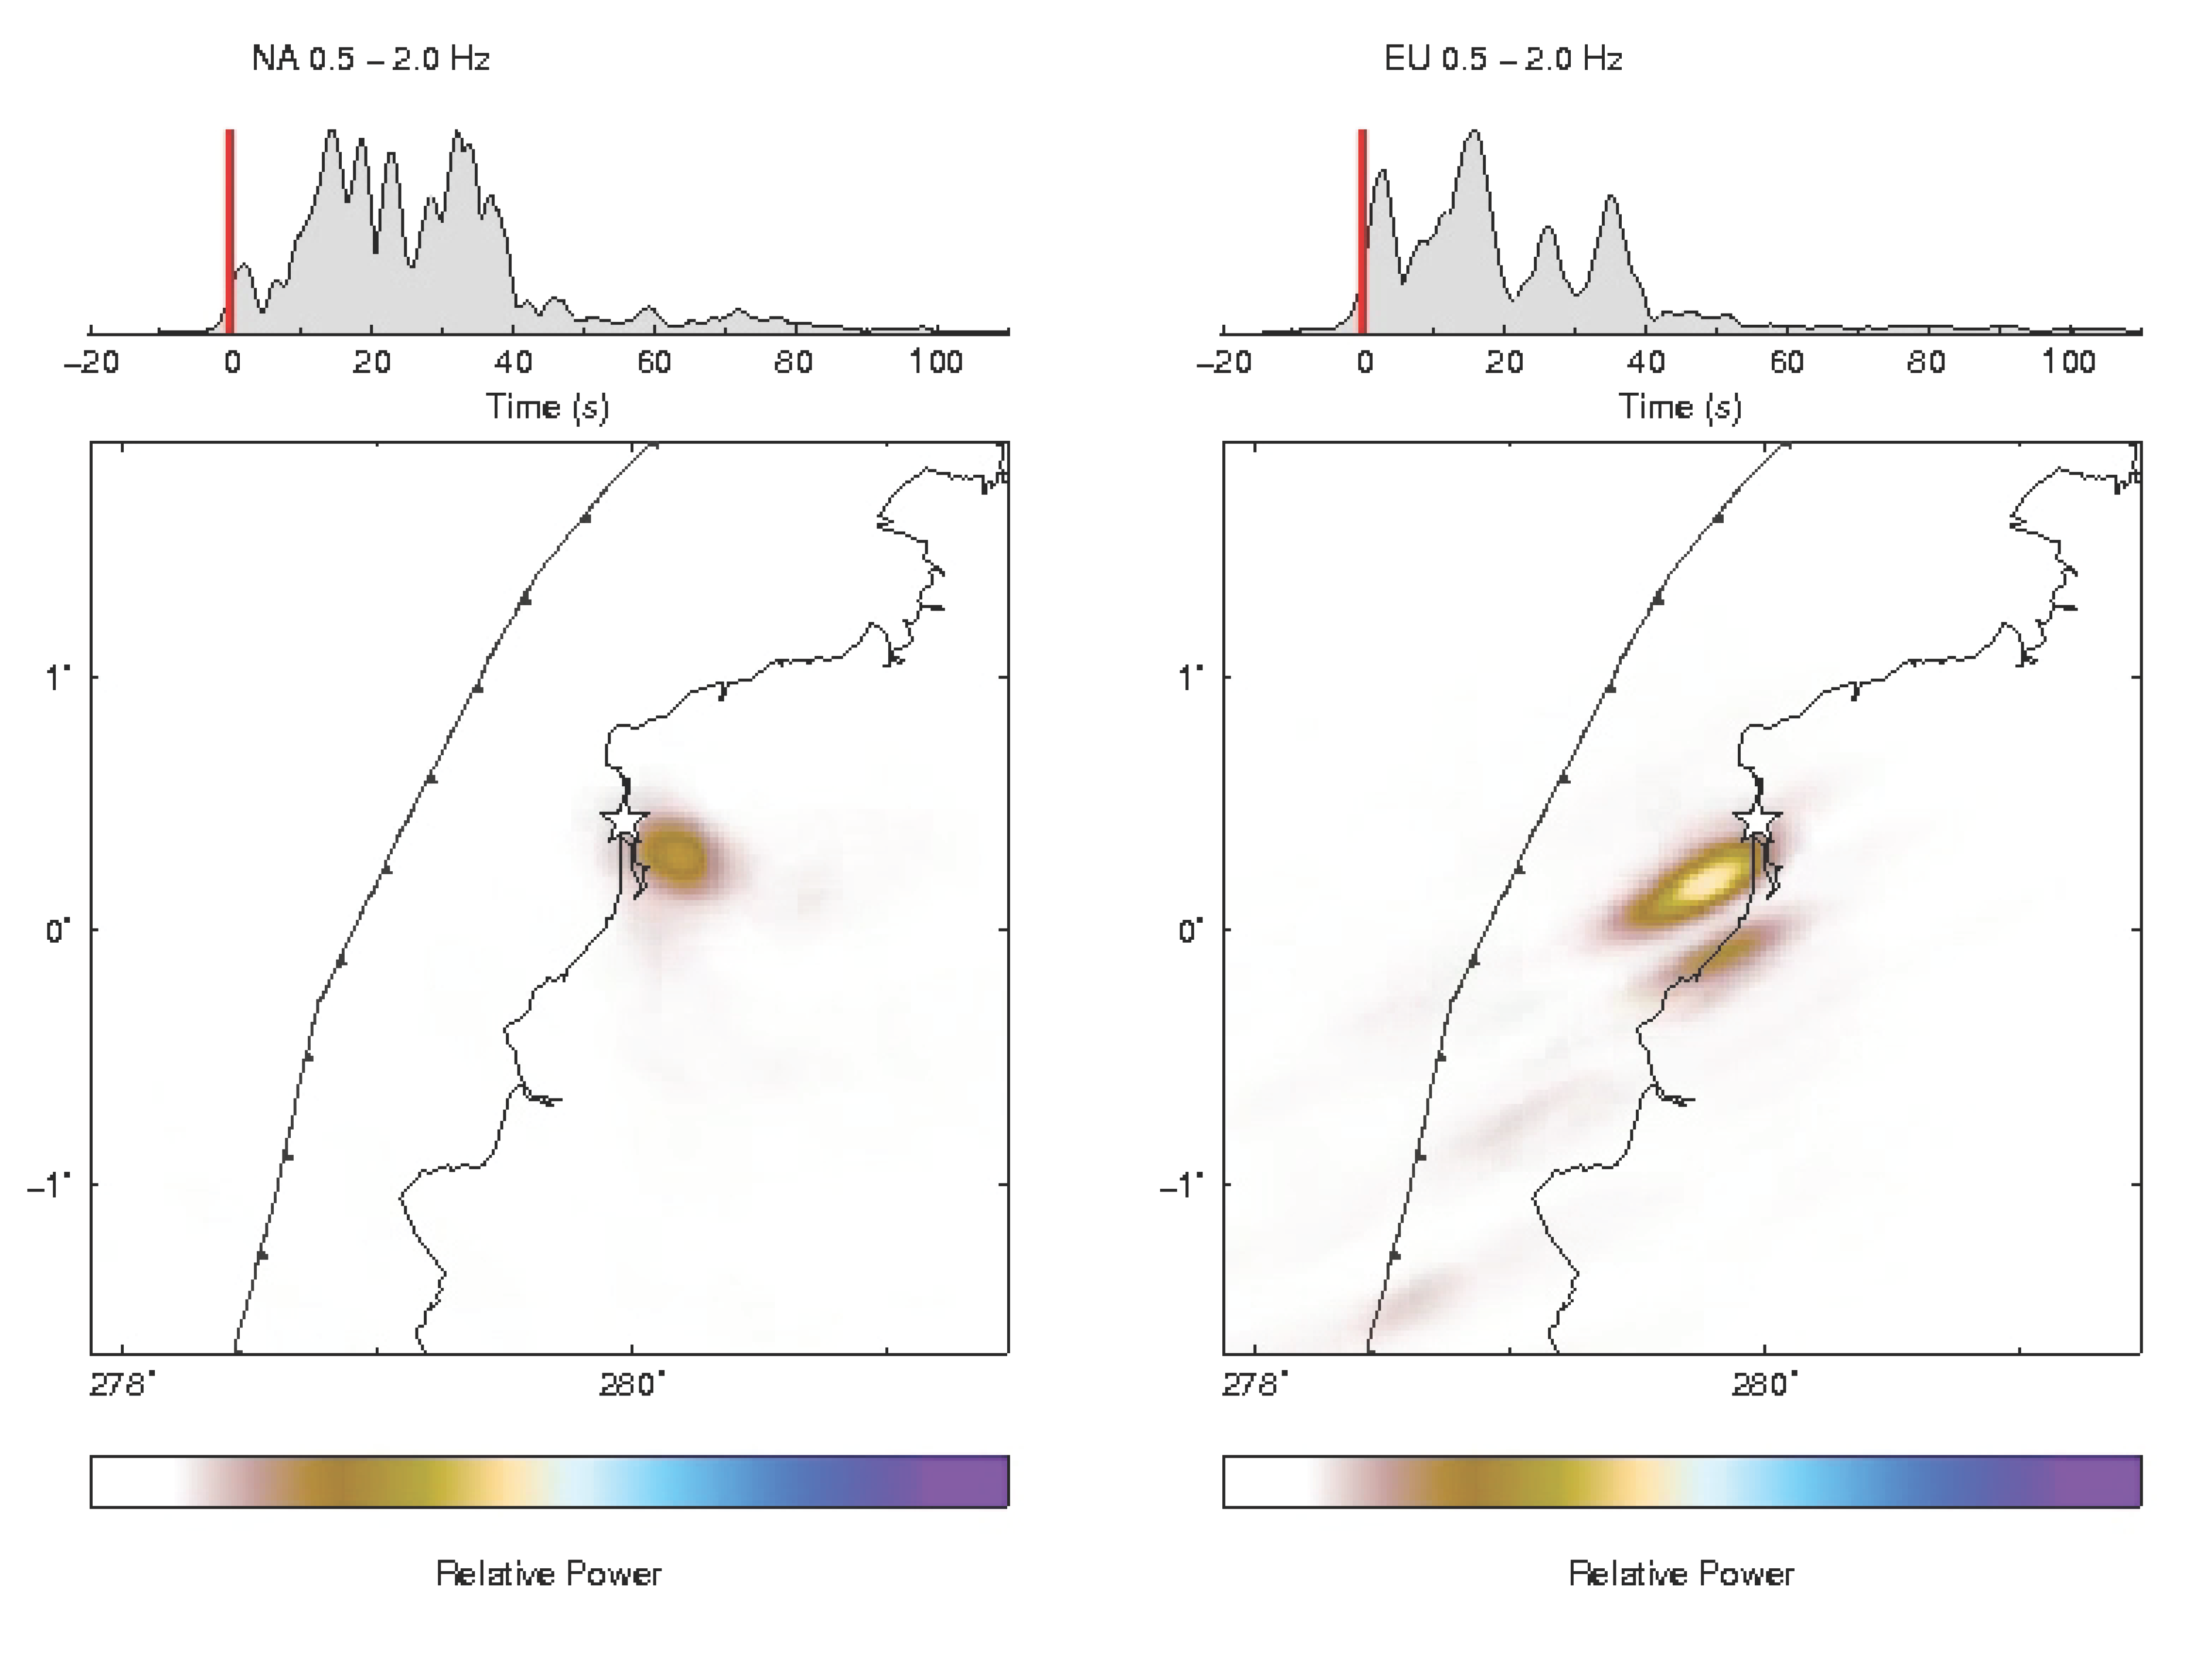
**

**M1 –** Back-projections of 0.5-2.0 Hz P waves from NA and EU networks.

**
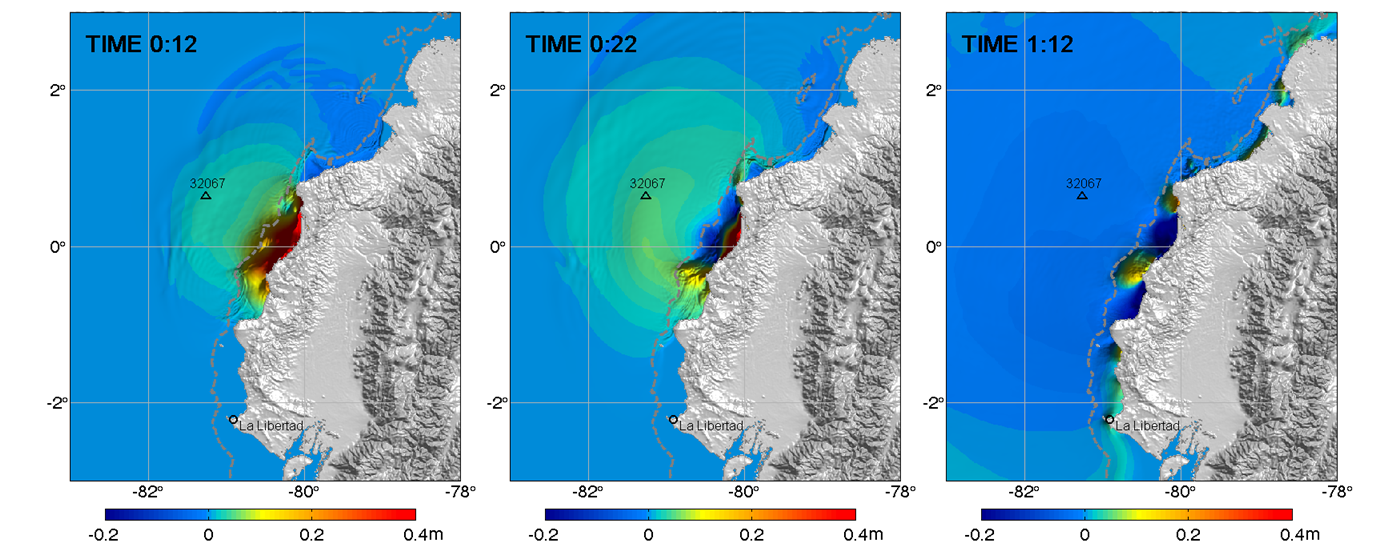
**

**M2 –** Zoom-in tsunami animation to DART 32067 and along the coast of Ecuador.


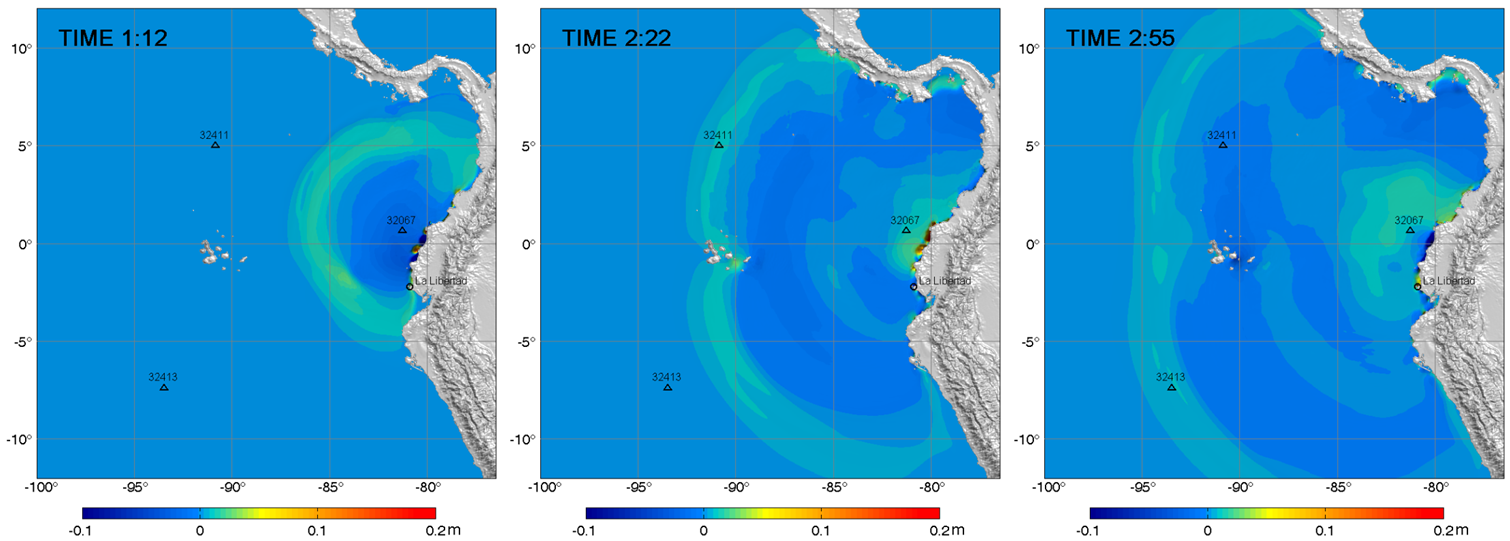


**M3 –** Large-Area tsunami animation to 3 DART stations and along the coasts of South and Central America.

**
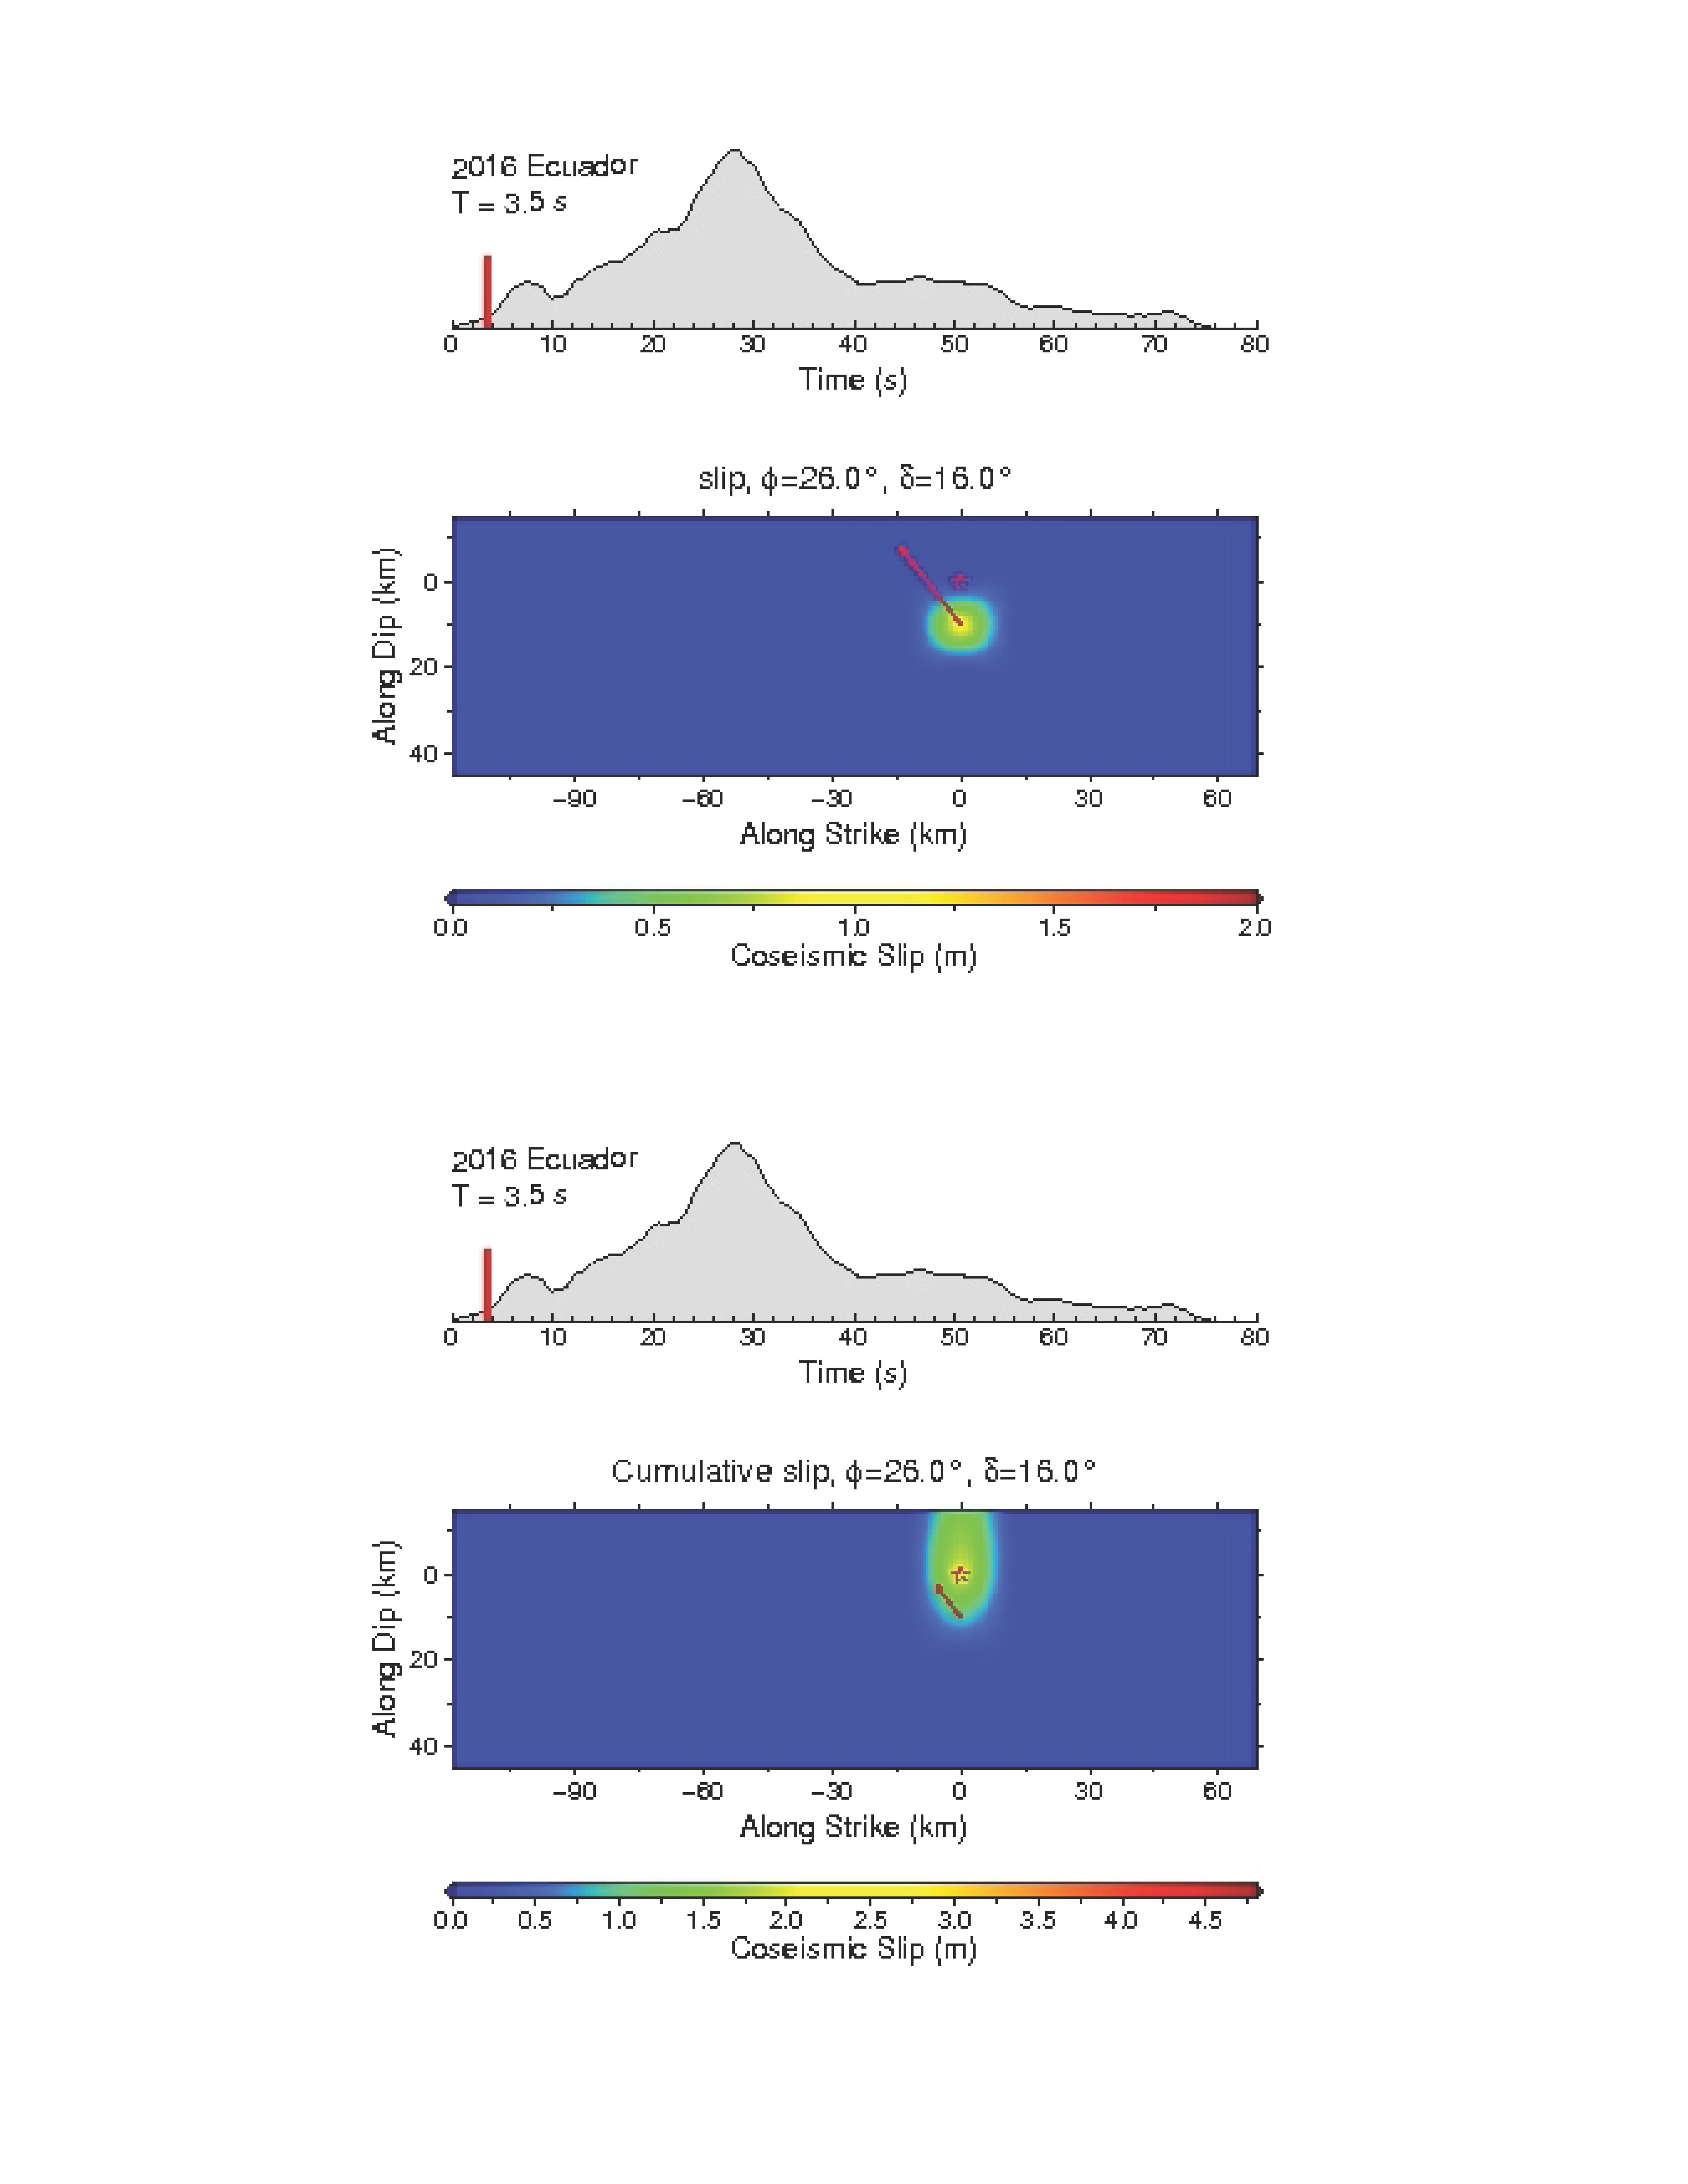
**

**M4 –** Rupture animation for slip (top) and cumulative slip (bottom) for the preferred fault model for the 2016 Ecuador earthquake. The moment-rate function is shown above each slip distribution, with a moving time indicator.
